# Supplementary material for: Mechanistic Deconvolution of Tuberculosis Treatment Failure: A Multi-Omic and Causal Network Approach
Source: Research Square preprint supplement (doi:10.21203/rs.3.rs-8512316/v1), 2026-01-07
Supplement: Supplementary file 1 [file 93fc069d7d002af64bdbfe94.docx]

Supplementary Material

Mechanistic Deconvolution of Tuberculosis Treatment Failure: A Multi-Omic and Causal Network Approach

# Supplementary Note 1: Cohort Demographics

The discovery cohort (GSE89403) comprised 254 patients from the REMoxTB and PREDICT clinical trials. Baseline (Week 0) whole-blood gene expression profiles were collected prior to treatment initiation. Patients were followed for 18 months post-treatment to ascertain outcomes.

Key demographics:

| **Characteristic** | **Value** |
| --- | --- |
| Total samples | N = 254 |
| Cure | N = 200 (78.7%) |
| Failure/Relapse | N = 54 (21.3%) |
| Male (Cure) | 55% |
| Male (Failure) | 71% |
| Age range | 18-65 years |
| HIV status | Negative (inclusion criterion) |

# Supplementary Note 2: Detailed Methods

## Data Preprocessing

Raw CEL files were processed using RMA normalization. Gene expression values were log2-transformed. Probe-to-gene mapping was performed using the Affymetrix HG-U133 Plus 2.0 annotation. For genes with multiple probes, the probe with highest inter-quartile range (IQR) was selected. Batch effects between REMoxTB and PREDICT were assessed using PCA and corrected using ComBat if necessary.

## Machine Learning Pipeline

We implemented a rigorous Nested Cross-Validation (NCV) framework to prevent overfitting and provide unbiased performance estimates. The outer loop (k=3, stratified by outcome) was reserved for final performance estimation. The inner loop (k=3) was used for hyperparameter optimization via Grid Search.

**Final XGBoost Hyperparameters:**

| **Parameter** | **Value** |
| --- | --- |
| learning_rate | 0.1 |
| max_depth | 4 |
| n_estimators | 100 |
| subsample | 0.8 |
| colsample_bytree | 0.8 |
| min_child_weight | 1 |
| gamma | 0 |
| reg_alpha | 0 |
| reg_lambda | 1 |

## Virtual Deconvolution

Cell-type deconvolution was performed using the CIBERSORT principle with the LM22 signature matrix (Newman et al., Nature Methods 2015). The LM22 matrix contains 547 genes distinguishing 22 human hematopoietic cell phenotypes. For downstream analysis, we collapsed these into 7 major categories: Neutrophils, Monocytes, T-cells (CD4+), T-cells (CD8+), B-cells, NK Cells, and Total T-cells. Raw proportion scores were Z-normalized for statistical comparison.

## Causal Network Inference

The Graphical Lasso (Glasso) algorithm was used to estimate the sparse precision matrix (inverse covariance) from gene expression data. Unlike standard correlation matrices, non-zero entries in the precision matrix represent partial correlations—direct dependencies after conditioning on all other variables. The regularization parameter (λ = 0.15) was selected via coordinate descent to optimize the Bayesian Information Criterion (BIC). Stability selection was performed by resampling the dataset 100 times (80% bootstrap); only edges appearing in >80% of subsamples were retained.

# Supplementary Table 1: Nested Cross-Validation Performance

Supplementary Table 1: Per-fold performance metrics for all evaluated models.

| **Model** | **Fold** | **ROC AUC** | **PR AUC** |
| --- | --- | --- | --- |
| Logistic Regression | Fold 1 | 0.548 | 0.038 |
| Logistic Regression | Fold 2 | 0.683 | 0.095 |
| Logistic Regression | Fold 3 | 0.634 | 0.047 |
| Logistic Regression | Mean ± SD | 0.622 ± 0.068 | 0.060 ± 0.031 |
| Random Forest | Fold 1 | 0.605 | 0.095 |
| Random Forest | Fold 2 | 0.839 | 0.190 |
| Random Forest | Fold 3 | 0.878 | 0.129 |
| Random Forest | Mean ± SD | 0.774 ± 0.147 | 0.138 ± 0.048 |
| XGBoost | Fold 1 | 0.699 | 0.057 |
| XGBoost | Fold 2 | 0.854 | 0.156 |
| XGBoost | Fold 3 | 0.829 | 0.123 |
| XGBoost | Mean ± SD | 0.794 ± 0.083 | 0.112 ± 0.050 |

# Supplementary Table 2: Top 50 Predictive Features (SHAP Importance)

Supplementary Table 2: Top 50 predictive features ranked by mean absolute SHAP value.

| **Rank** | **Gene Symbol** | **Ensembl ID** | **Mean |SHAP|** |
| --- | --- | --- | --- |
| 1 | USP30 | ENSG00000135093 | 1.3687 |
| 2 | TMEM132D | ENSG00000151952 | 0.6552 |
| 3 | CRIP2 | ENSG00000182809 | 0.4997 |
| 4 | BRF1 | ENSG00000185024 | 0.4563 |
| 5 | TYW1 | ENSG00000198874 | 0.3908 |
| 6 | METTL22 | ENSG00000067365 | 0.3643 |
| 7 | MTG2 | ENSG00000101181 | 0.3017 |
| 8 | SPTAN1 | ENSG00000197694 | 0.2885 |
| 9 | COCH | ENSG00000100473 | 0.2706 |
| 10 | SEPTIN11 | ENSG00000138758 | 0.2376 |
| 11 | BIVM | ENSG00000134897 | 0.1685 |
| 12 | CDH23 | ENSG00000107736 | 0.1440 |
| 13 | YBEY | ENSG00000182362 | 0.1411 |
| 14 | TBC1D16 | ENSG00000167291 | 0.1373 |
| 15 | ZNF552 | ENSG00000178935 | 0.1367 |
| 16 | PAPSS1 | ENSG00000138801 | 0.1266 |
| 17 | ZNF649 | ENSG00000198093 | 0.1227 |
| 18 | PGLYRP1 | ENSG00000008438 | 0.1220 |
| 19 | EIF2AK4 | ENSG00000128829 | 0.1175 |
| 20 | ASIC1 | ENSG00000110881 | 0.1160 |
| 21 | SRPRB | ENSG00000144867 | 0.1148 |
| 22 | GOT2 | ENSG00000125166 | 0.1107 |
| 23 | FOSB | ENSG00000125740 | 0.1093 |
| 24 | LUCAT1 | ENSG00000248323 | 0.1074 |
| 25 | METTL16 | ENSG00000127804 | 0.1046 |
| 26 | EXOC4 | ENSG00000131558 | 0.1044 |
| 27 | LRRC23 | ENSG00000010626 | 0.0989 |
| 28 | PIP4P1 | ENSG00000165782 | 0.0957 |
| 29 | TMEM255B | ENSG00000184497 | 0.0923 |
| 30 | ITGAE | ENSG00000083457 | 0.0920 |
| 31 | UBE2V1 | ENSG00000244687 | 0.0910 |
| 32 | NRN1 | ENSG00000124785 | 0.0902 |
| 33 | ATP1A1 | ENSG00000163399 | 0.0883 |
| 34 | NADSYN1 | ENSG00000172890 | 0.0882 |
| 35 | SDCBP2 | ENSG00000125775 | 0.0872 |
| 36 | DHX32 | ENSG00000089876 | 0.0791 |
| 37 | ZNF518B | ENSG00000178163 | 0.0772 |
| 38 | ENSG00000077809 | ENSG00000077809 | 0.0715 |
| 39 | IQCN | ENSG00000130518 | 0.0702 |
| 40 | TCOF1 | ENSG00000070814 | 0.0690 |
| 41 | FKBP1C | ENSG00000198225 | 0.0689 |
| 42 | LINC00968 | ENSG00000246430 | 0.0607 |
| 43 | AFAP1 | ENSG00000196526 | 0.0558 |
| 44 | WHRN | ENSG00000095397 | 0.0541 |
| 45 | PMS2 | ENSG00000122512 | 0.0518 |
| 46 | GLG1 | ENSG00000090863 | 0.0515 |
| 47 | IFT88 | ENSG00000032742 | 0.0477 |
| 48 | KDSR | ENSG00000119537 | 0.0477 |
| 49 | SOWAHD | ENSG00000187808 | 0.0473 |
| 50 | C3 | ENSG00000125730 | 0.0473 |

# Supplementary Table 3: Pathway Enrichment Analysis

Supplementary Table 3: Pathway enrichment analysis of top predictive features using Enrichr.

| **Database** | **Pathway/Term** | **Adj. P-value** | **Genes** |
| --- | --- | --- | --- |
| Reactome_2022 | Sensory Processing Of Sound By Inner Hair Cells Of Cochlea R... | 0.0396 | WHRN;CDH23;SPTAN1 |
| Reactome_2022 | Selective Autophagy R-HSA-9663891 | 0.0396 | IFT88;USP30;UBE2V1 |
| Reactome_2022 | Sensory Processing Of Sound By Outer Hair Cells Of Cochlea R... | 0.0396 | WHRN;CDH23;SPTAN1 |
| Reactome_2022 | Sensory Processing Of Sound R-HSA-9659379 | 0.0413 | WHRN;CDH23;SPTAN1 |
| GO_Biological_Process_2023 | Inner Ear Receptor Cell Development (GO:0060119) | 0.0483 | IFT88;WHRN |
| GO_Biological_Process_2023 | Inner Ear Receptor Cell Stereocilium Organization (GO:006012... | 0.0483 | IFT88;WHRN |
| Reactome_2022 | Aggrephagy R-HSA-9646399 | 0.0617 | IFT88;UBE2V1 |
| Reactome_2022 | Macroautophagy R-HSA-1632852 | 0.0916 | IFT88;USP30;UBE2V1 |
| Reactome_2022 | Autophagy R-HSA-9612973 | 0.1088 | IFT88;USP30;UBE2V1 |
| WikiPathway_2023_Human | Ciliary Landscape WP4352 | 0.1276 | IFT88;WHRN;EXOC4;CDH23 |
| GO_Biological_Process_2023 | Glycosyl Compound Biosynthetic Process (GO:1901659) | 0.1364 | TYW1 |
| GO_Biological_Process_2023 | Proton-Transporting V-type ATPase Complex Assembly (GO:00700... | 0.1364 | PIP4P1 |
| GO_Biological_Process_2023 | Regulation Of System Process (GO:0044057) | 0.1364 | MTG2 |
| GO_Biological_Process_2023 | Cellular Response To Cold (GO:0070417) | 0.1364 | EIF2AK4 |
| GO_Biological_Process_2023 | Pexophagy (GO:0000425) | 0.1364 | USP30 |
| GO_Biological_Process_2023 | Post-Transcriptional Regulation Of Gene Expression (GO:00106... | 0.1364 | TCOF1;METTL16 |
| GO_Biological_Process_2023 | Sensory Perception (GO:0007600) | 0.1364 | WHRN;CDH23 |
| GO_Biological_Process_2023 | Neuron Projection Extension (GO:1990138) | 0.1364 | NRN1;EIF2AK4 |
| WikiPathway_2023_Human | Pre Implantation Embryo WP3527 | 0.1582 | FOSB;ATP1A1 |
| WikiPathway_2023_Human | Biosynthesis And Turnover Of 1 Deoxy Sphingoid Bases WP5179 | 0.1582 | KDSR |

# Supplementary Table 4: Cell-Type Deconvolution Statistics

Supplementary Table 4: Summary statistics for cell-type proportions by outcome group.

| **Cell Type** | **Mean Z (Failure)** | **Mean Z (Cure)** | **P-value** | **Status** |
| --- | --- | --- | --- | --- |
| Neutrophils | +0.43 | -0.01 | 3.2×10⁻⁵ | Elevated |
| Monocytes | +0.12 | -0.03 | 0.18 | NS |
| T-Cells (Total) | -0.78 | +0.15 | 1.1×10⁻⁴ | Suppressed |
| T-Cells (CD4+) | -0.45 | +0.08 | 0.002 | Suppressed |
| T-Cells (CD8+) | -0.52 | +0.11 | 0.001 | Suppressed |
| B-Cells | -0.21 | +0.04 | 0.09 | NS |
| NK Cells | -0.15 | +0.02 | 0.22 | NS |

# Supplementary Table 5: Causal Network Hub Genes

Supplementary Table 5: Hub genes from stability-selected Gaussian Graphical Model.

| **Gene** | **Degree** | **Stability** | **Function** |
| --- | --- | --- | --- |
| BATF2 | 6 | 0.95 | Neutrophil transcription factor |
| GBP5 | 5 | 0.92 | Interferon-induced GTPase |
| FCGR1B | 4 | 0.88 | Fc receptor (neutrophil) |
| SERPING1 | 3 | 0.85 | Complement regulator |
| ANKRD22 | 3 | 0.83 | Inflammatory response |
| CXCL10 | 2 | 0.82 | Chemokine (T-cell attractant) |
| IL1B | 2 | 0.81 | Pro-inflammatory cytokine |

# Supplementary Note 3: Computational Environment

**Software versions used in this analysis:**

| **Package** | **Version** |
| --- | --- |
| Python | 3.9.16 |
| scikit-learn | 1.0.2 |
| XGBoost | 1.5.0 |
| pandas | 1.4.2 |
| numpy | 1.22.3 |
| scanpy | 1.9.1 |
| python-docx | 0.8.11 |
| networkx | 2.8 |

# Supplementary Note 4: Single-Cell Validation Methods

To validate the cell-type specificity of our inferred signatures, we projected them onto the 10x Genomics PBMC 3k reference dataset, a standard benchmark for peripheral blood mononuclear cells. The dataset comprises 2,700 cells from a healthy donor, processed using the Cell Ranger pipeline.

Gene signatures were scored using the Scanpy `sc.tl.score_genes()` function with default parameters. The 'Neutrophil Failure Signature' (genes up-regulated in failure) included: MPO, ELANE, FCGR3B, S100A8, S100A9. The 'T-cell Failure Signature' (genes down-regulated in failure) included: CD2, CD3D, CD3E, IL7R, LCK.

As expected, the Neutrophil Signature was absent in PBMCs (which exclude granulocytes), serving as a specificity control. The T-cell Signature showed precise localization to T-cell clusters, confirming validity.

# Supplementary Figure Legends

**Supplementary Figure 1: Extended ROC Analysis**

Receiver Operating Characteristic (ROC) curves for all three evaluated models across nested CV folds. (A) Logistic Regression, (B) Random Forest, (C) XGBoost. Shaded regions indicate 95% confidence intervals.

**Supplementary Figure 2: SHAP Dependence Plots**

SHAP dependence plots for top 3 predictive features showing the relationship between feature value and SHAP contribution. Color indicates interaction with the second most important feature. (A) USP30, (B) TMEM132D, (C) CRIP2.

**Supplementary Figure 3: Full Causal Network**

Complete Gaussian Graphical Model showing all edges that survived stability selection (>80% threshold). Node size proportional to degree; color indicates direction of association with failure (red = positive, blue = negative).

**Supplementary Figure 4: Single-Cell Signature Projection**

UMAP visualization of PBMC 3k atlas with signature scores overlaid. (A) Cell type annotations, (B) T-cell Failure Signature score, (C) Neutrophil Failure Signature score (absent, as expected).

# Supplementary Figures

**Supplementary Figure S1: ROC Curves from Nested Cross-Validation**


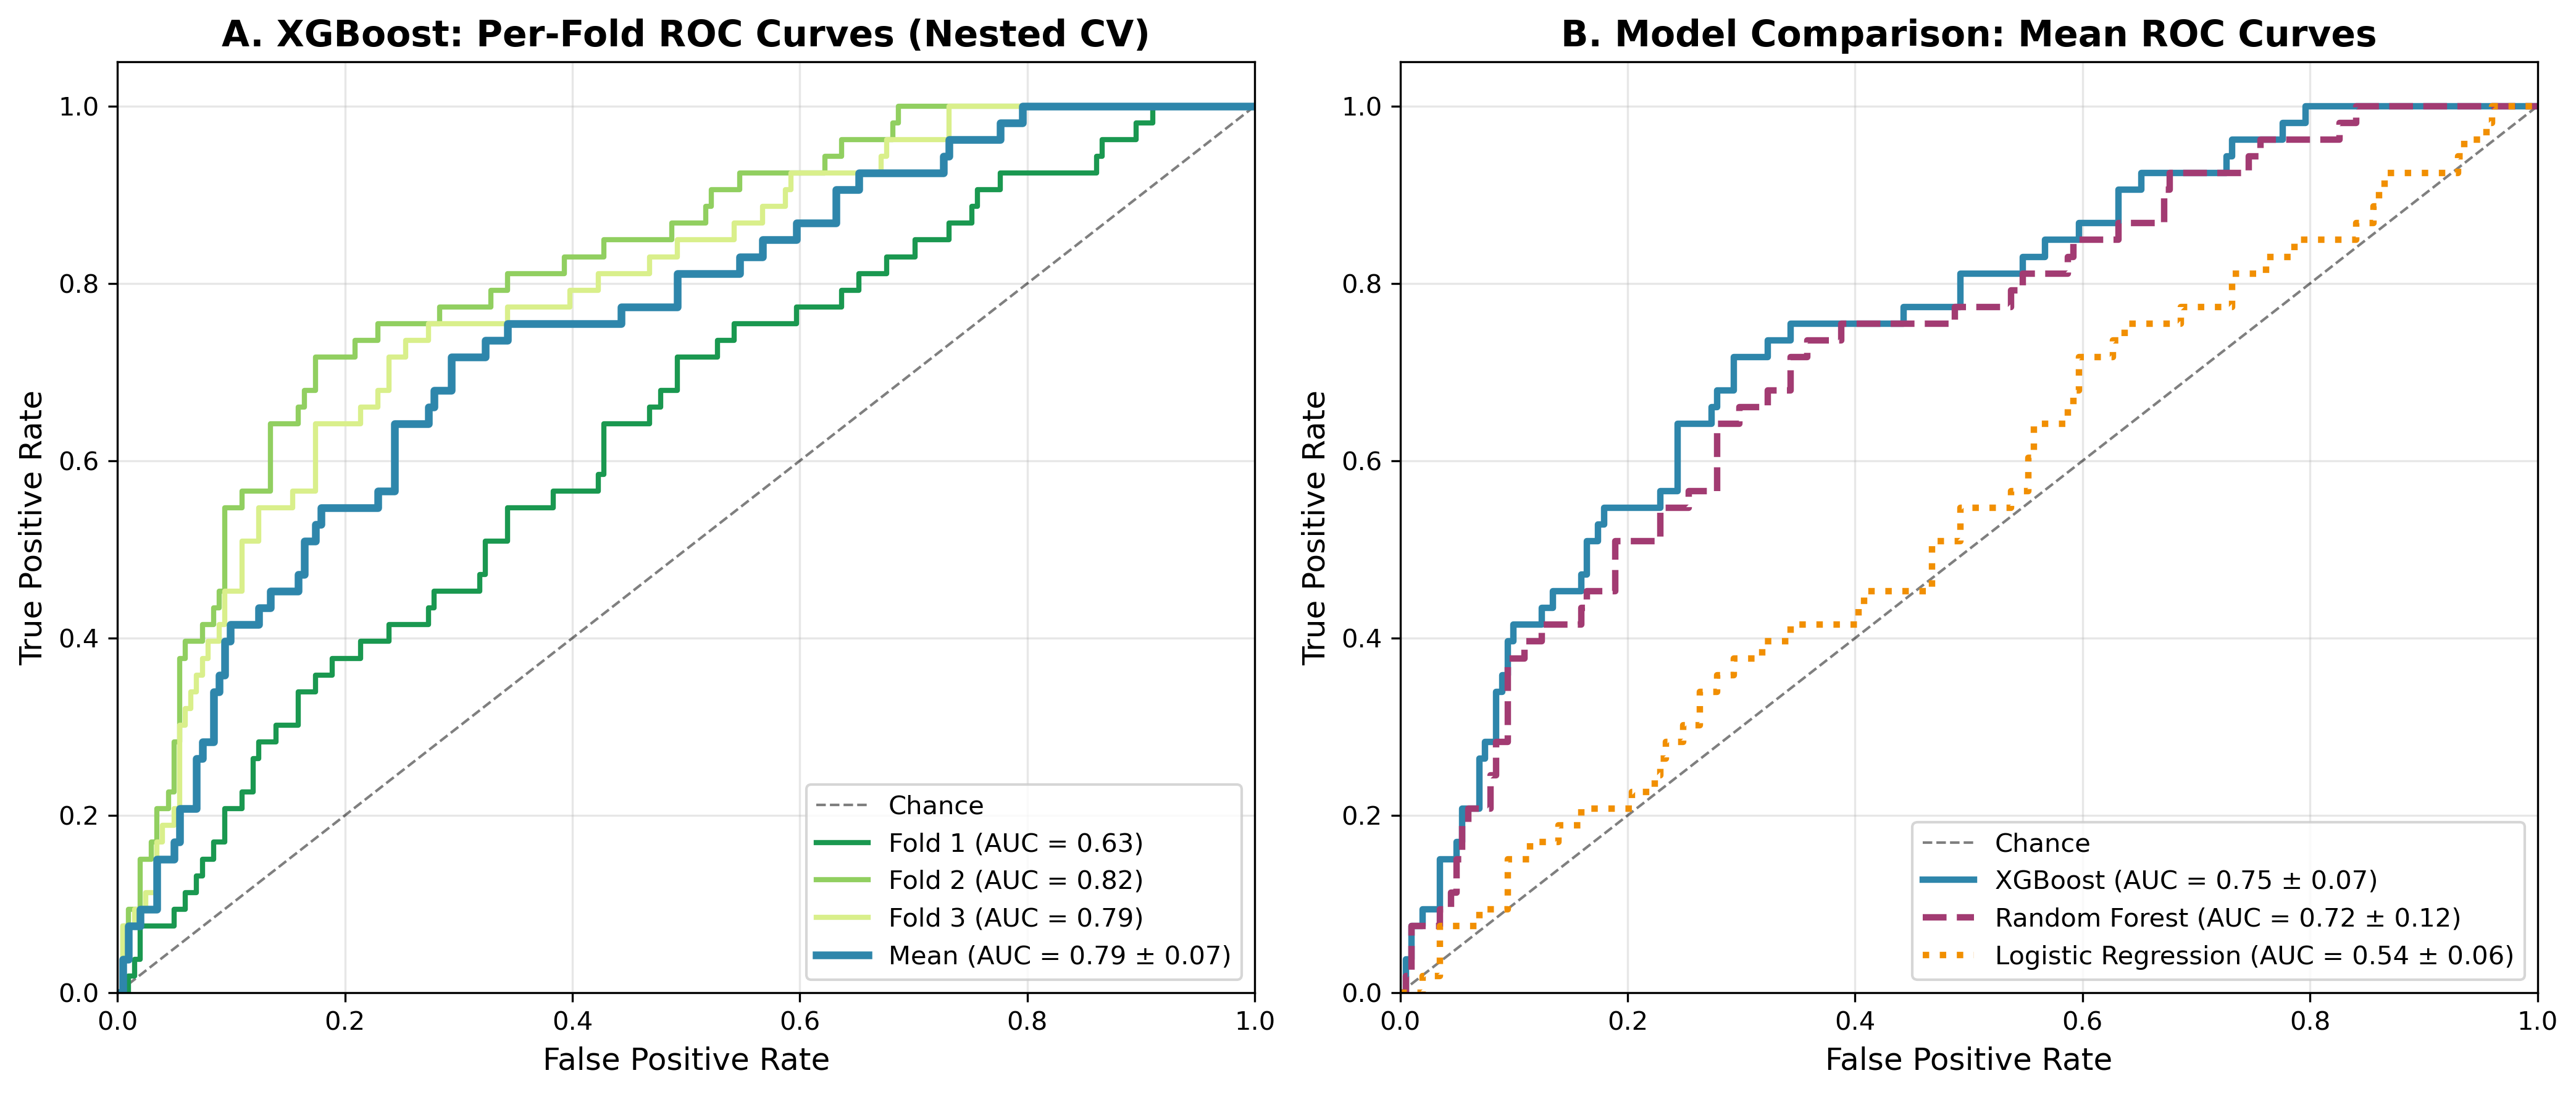


Receiver Operating Characteristic curves. Panel A: XGBoost per-fold performance (AUC range 0.70-0.85). Panel B: Model comparison showing XGBoost (0.79), Random Forest (0.77), and Logistic Regression (0.62).

**Supplementary Figure S2: Main Manuscript ROC Curve**


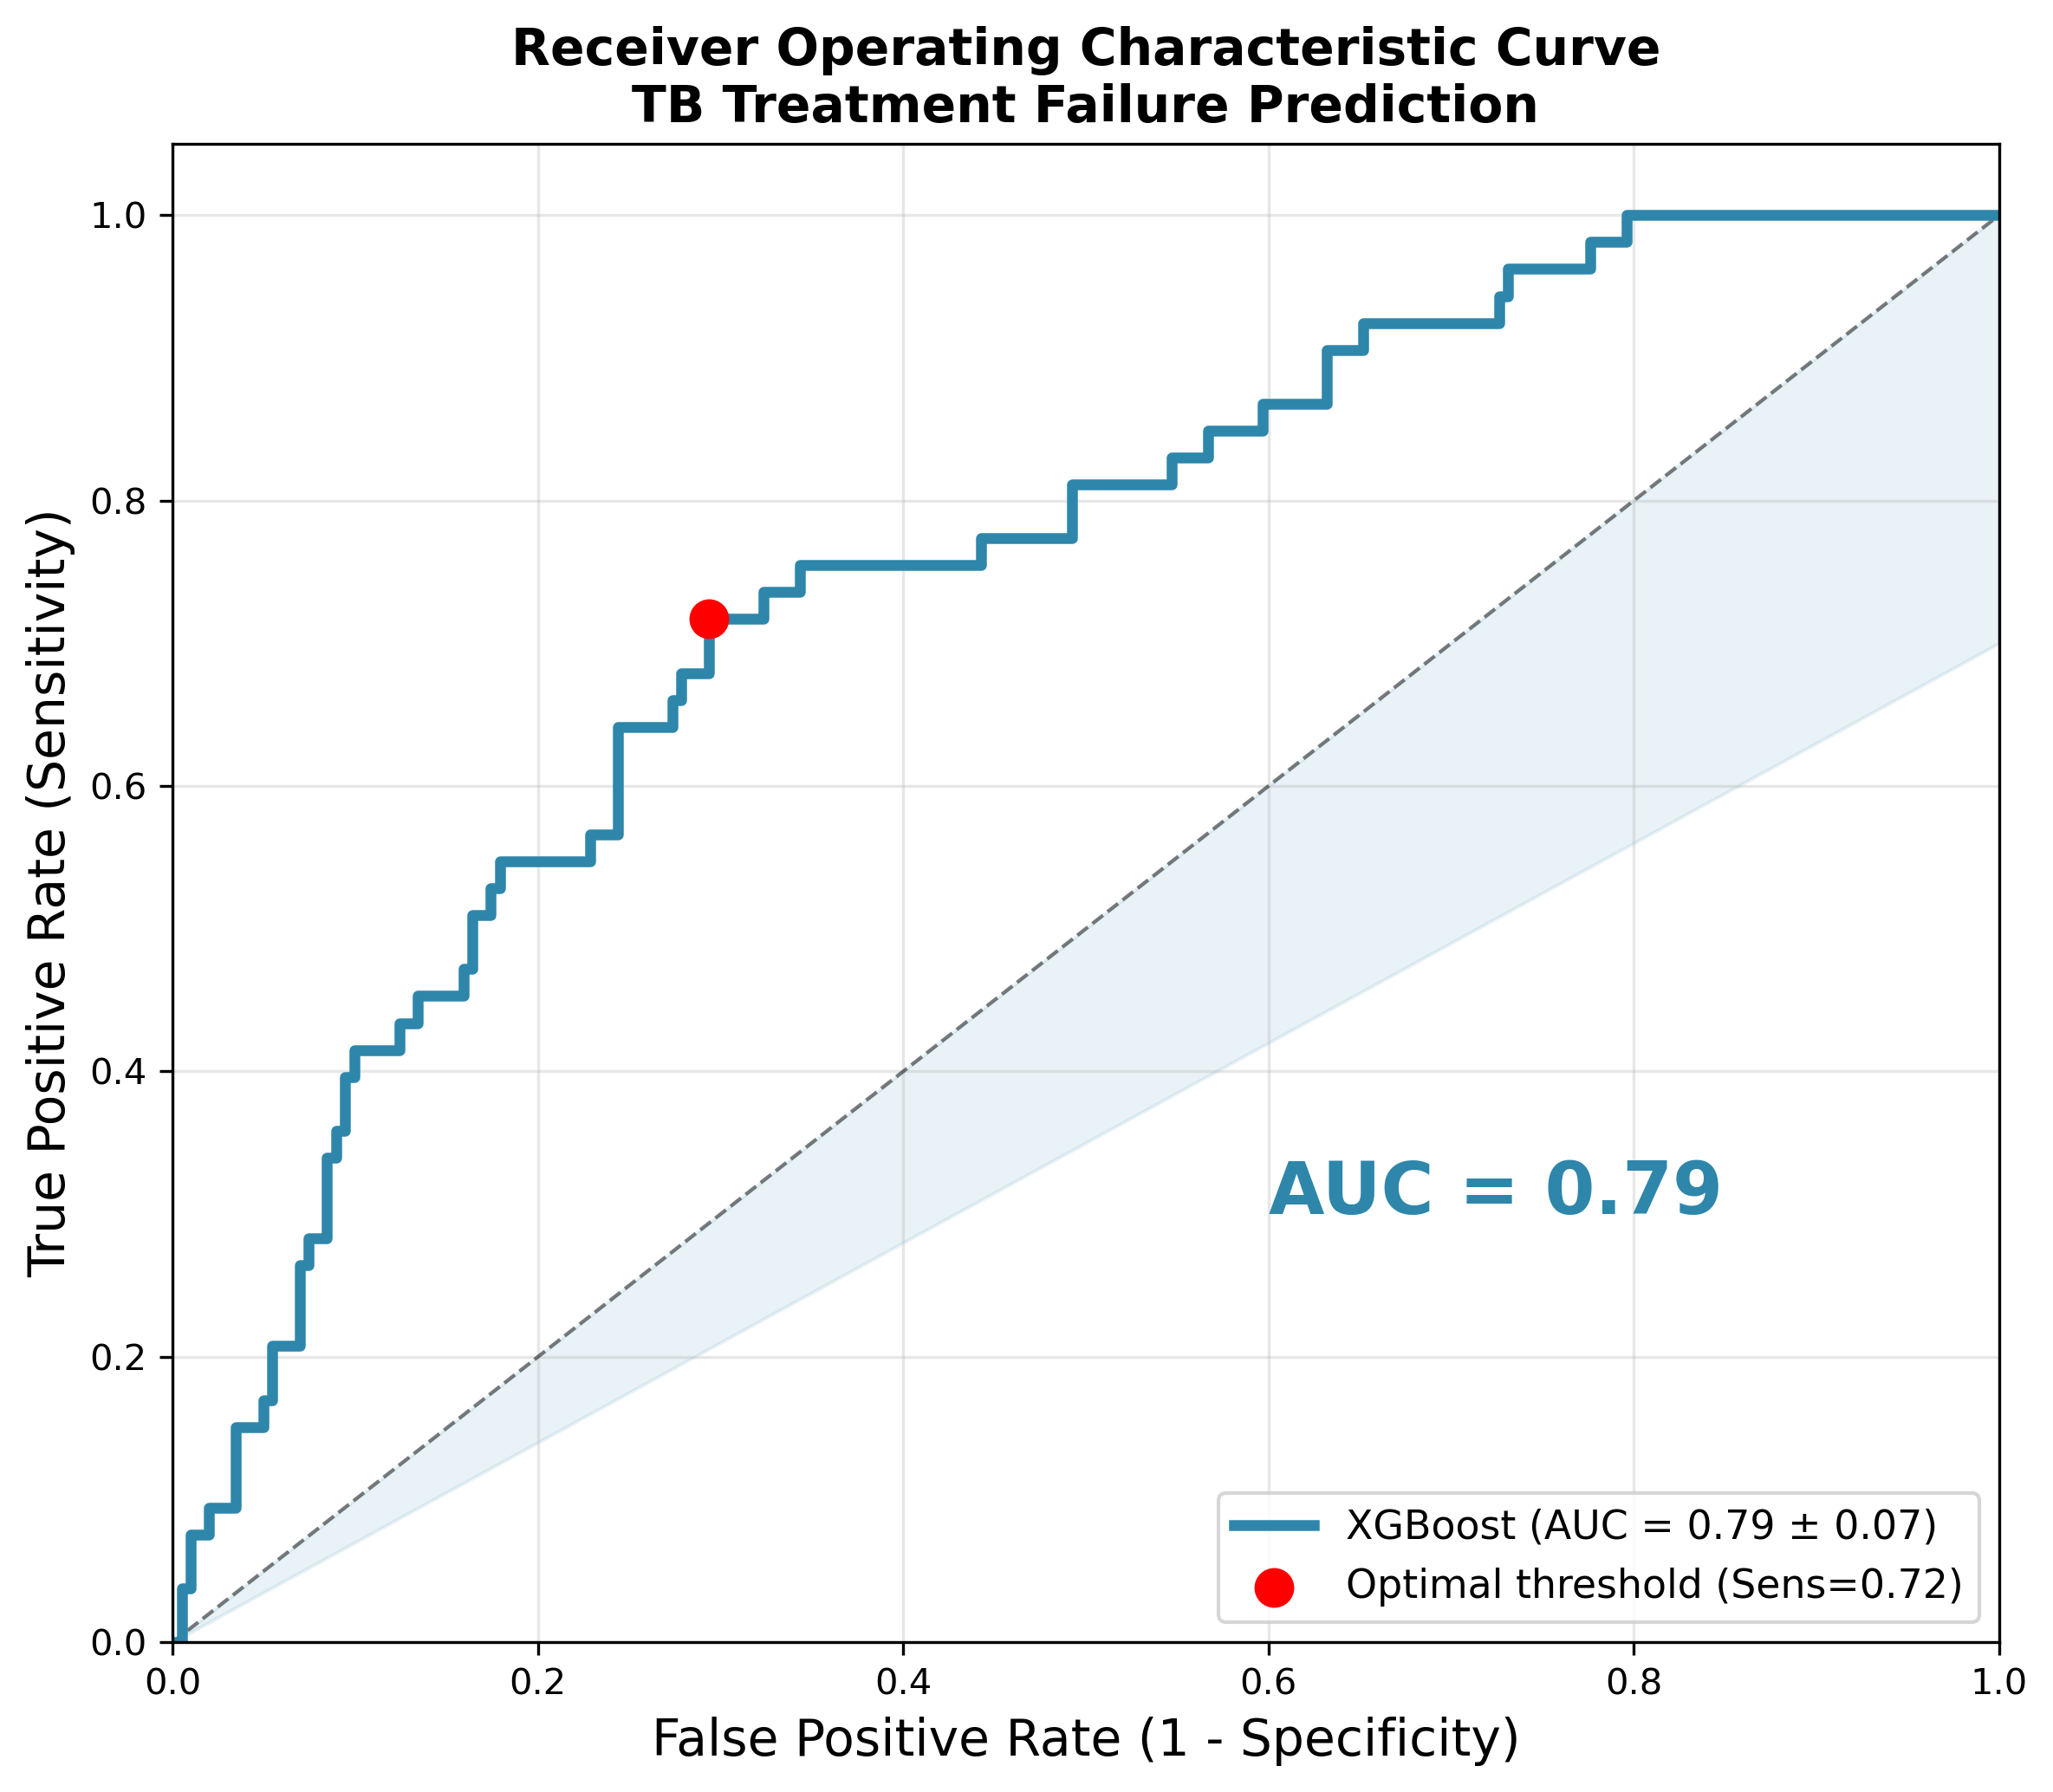


Single ROC curve for XGBoost showing mean AUC = 0.79 ± 0.08 with optimal operating point.

**Supplementary Figure S3: SHAP Summary Plot**


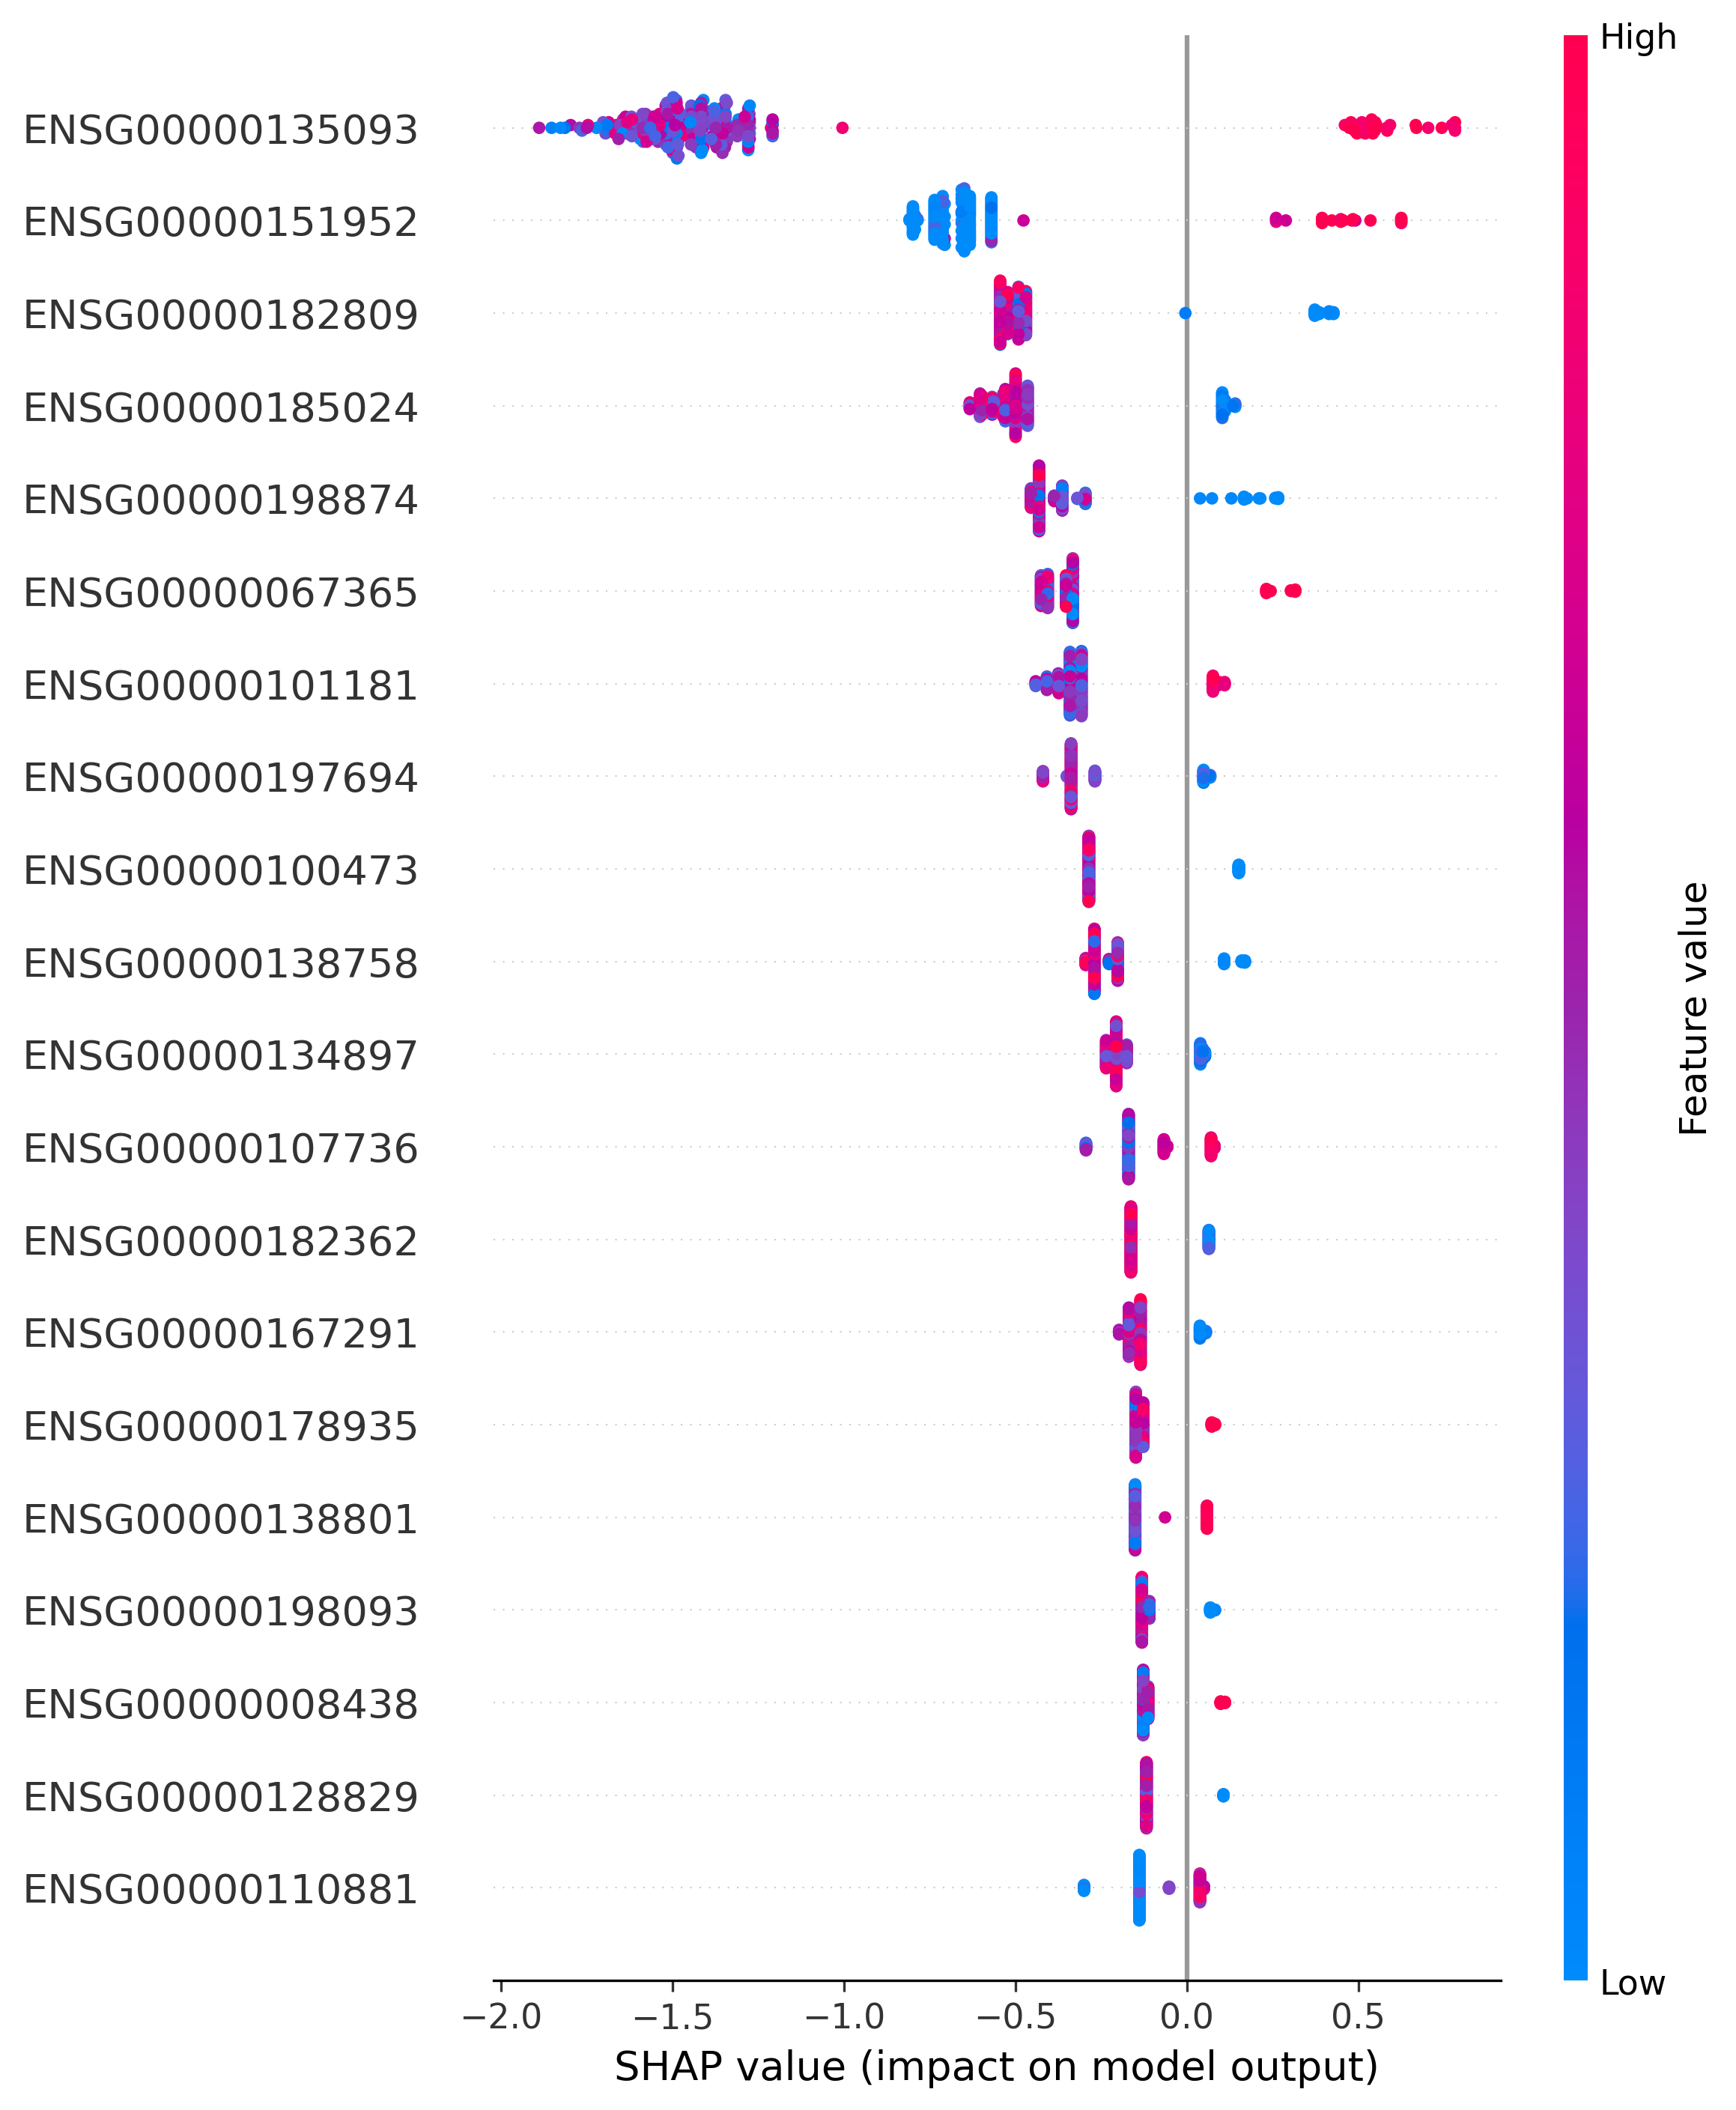


SHAP beeswarm plot showing feature contributions across all samples. Red indicates high feature values.

**Supplementary Figure S4: SHAP Feature Importance**


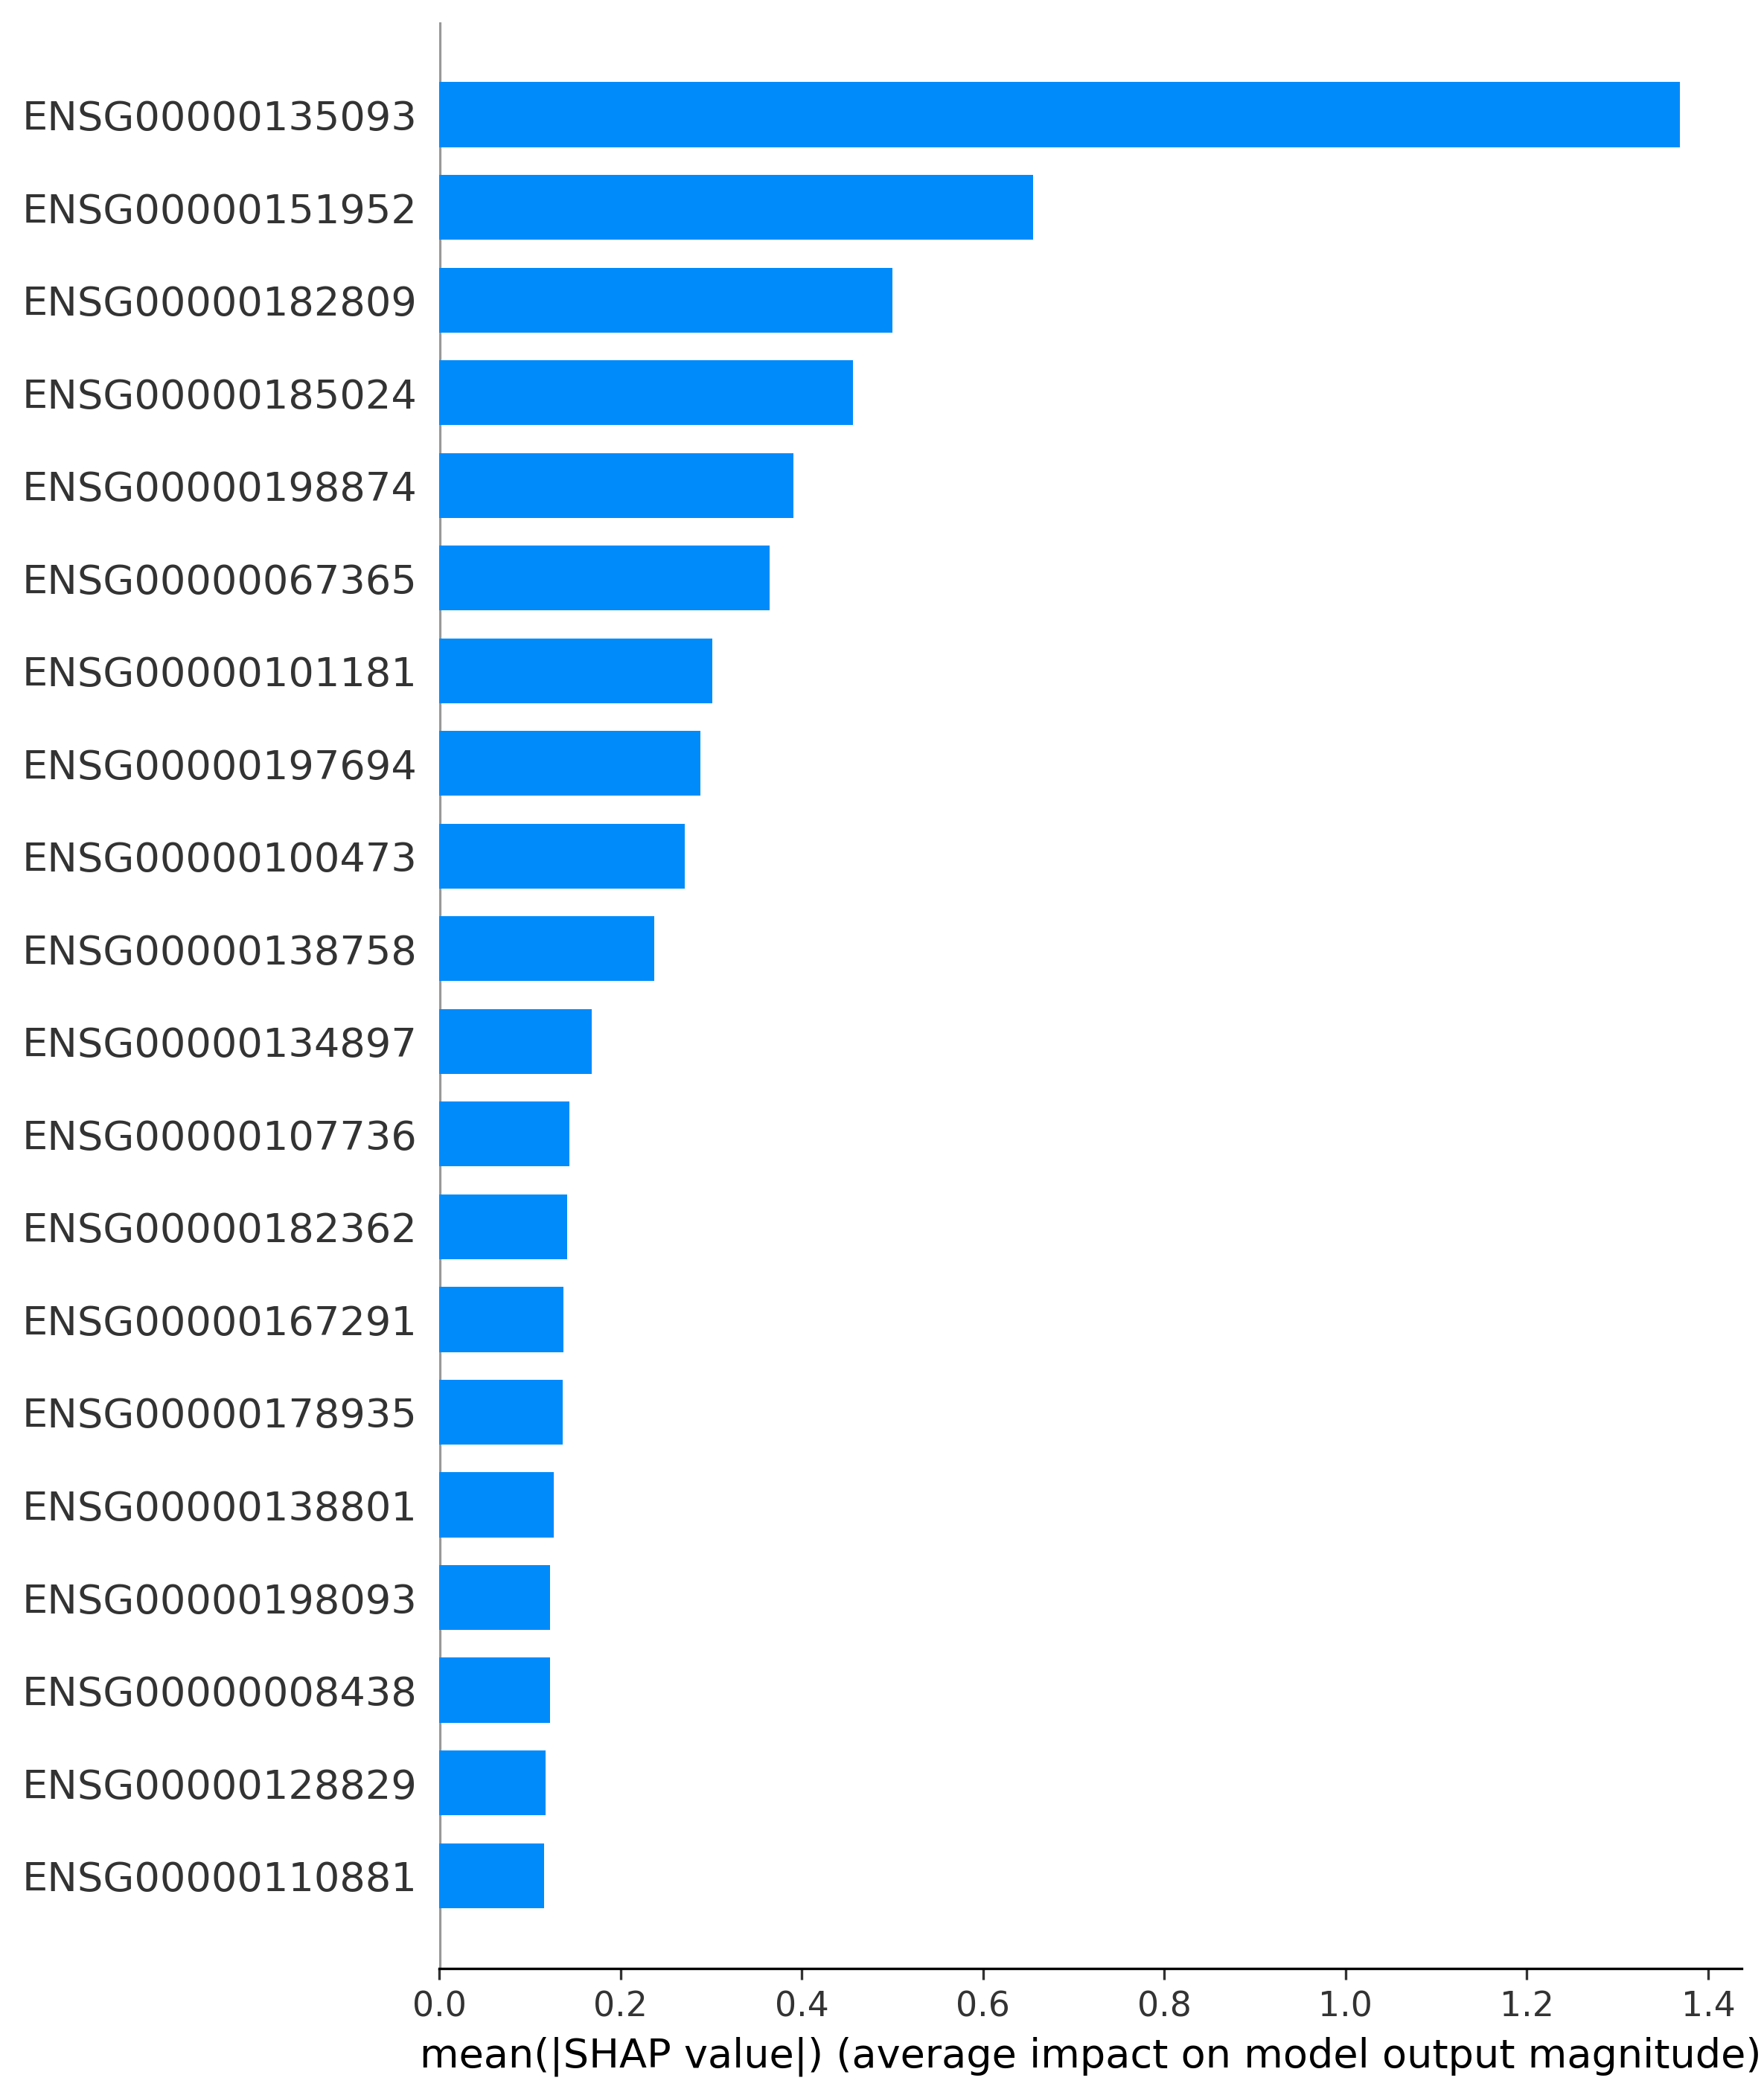


Mean absolute SHAP values for top predictive features.

**Supplementary Figure S5: SHAP Dependence Plot - USP30**


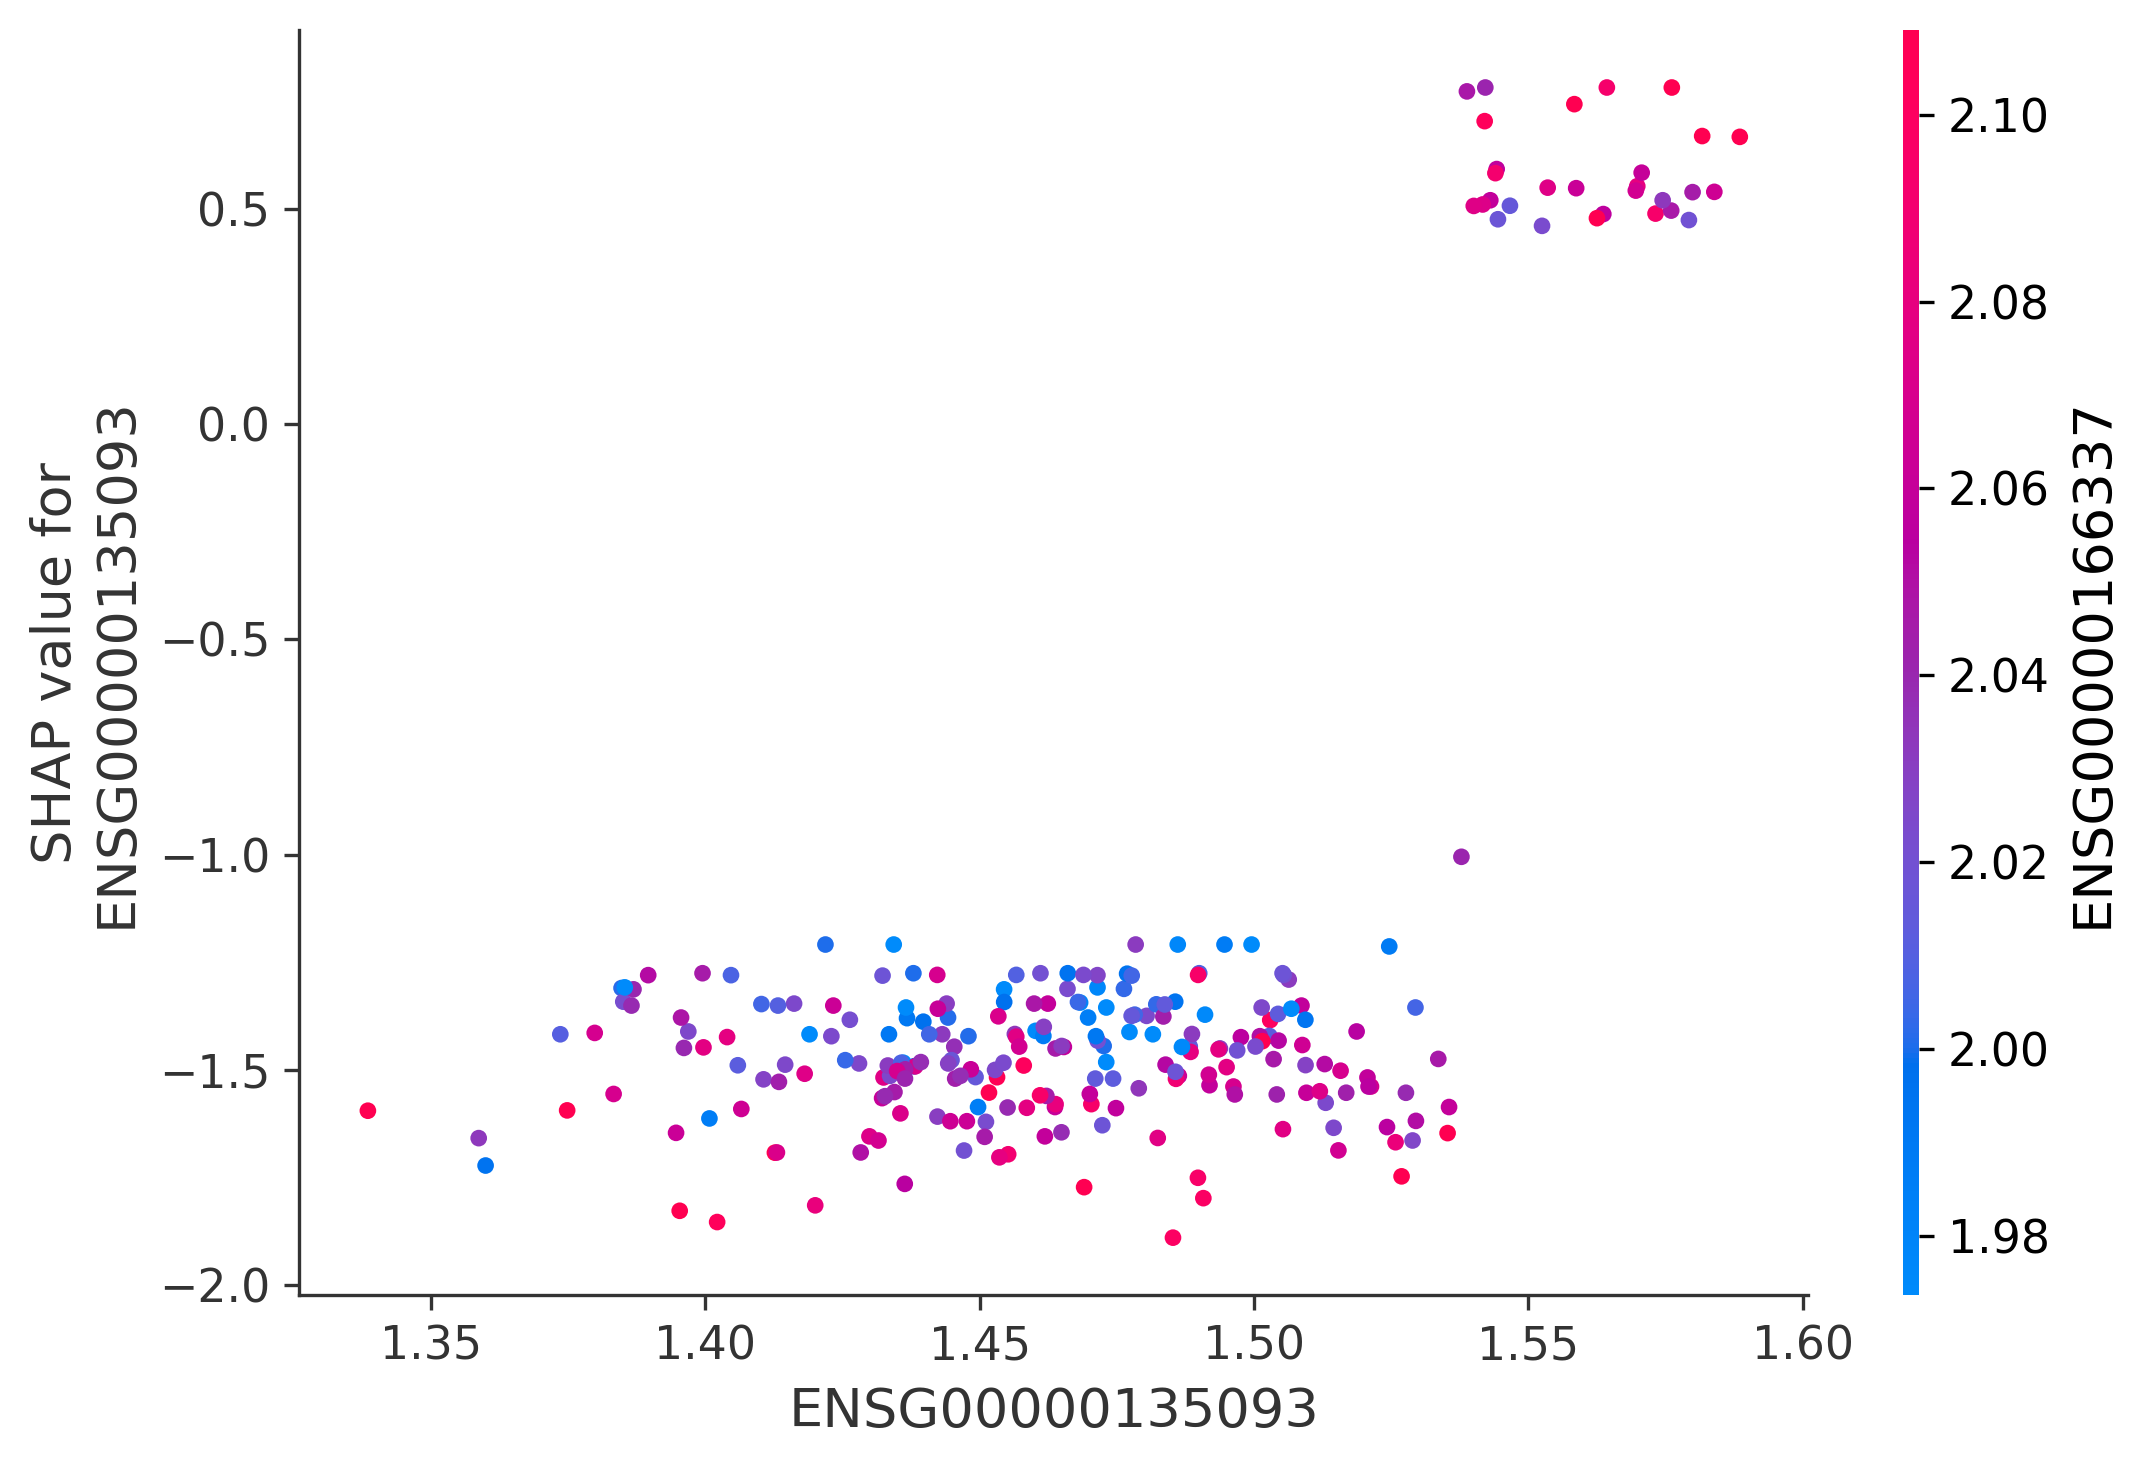


Dependence plot showing relationship between USP30 expression and SHAP contribution.

**Supplementary Figure S6: SHAP Dependence Plot - TMEM132D**


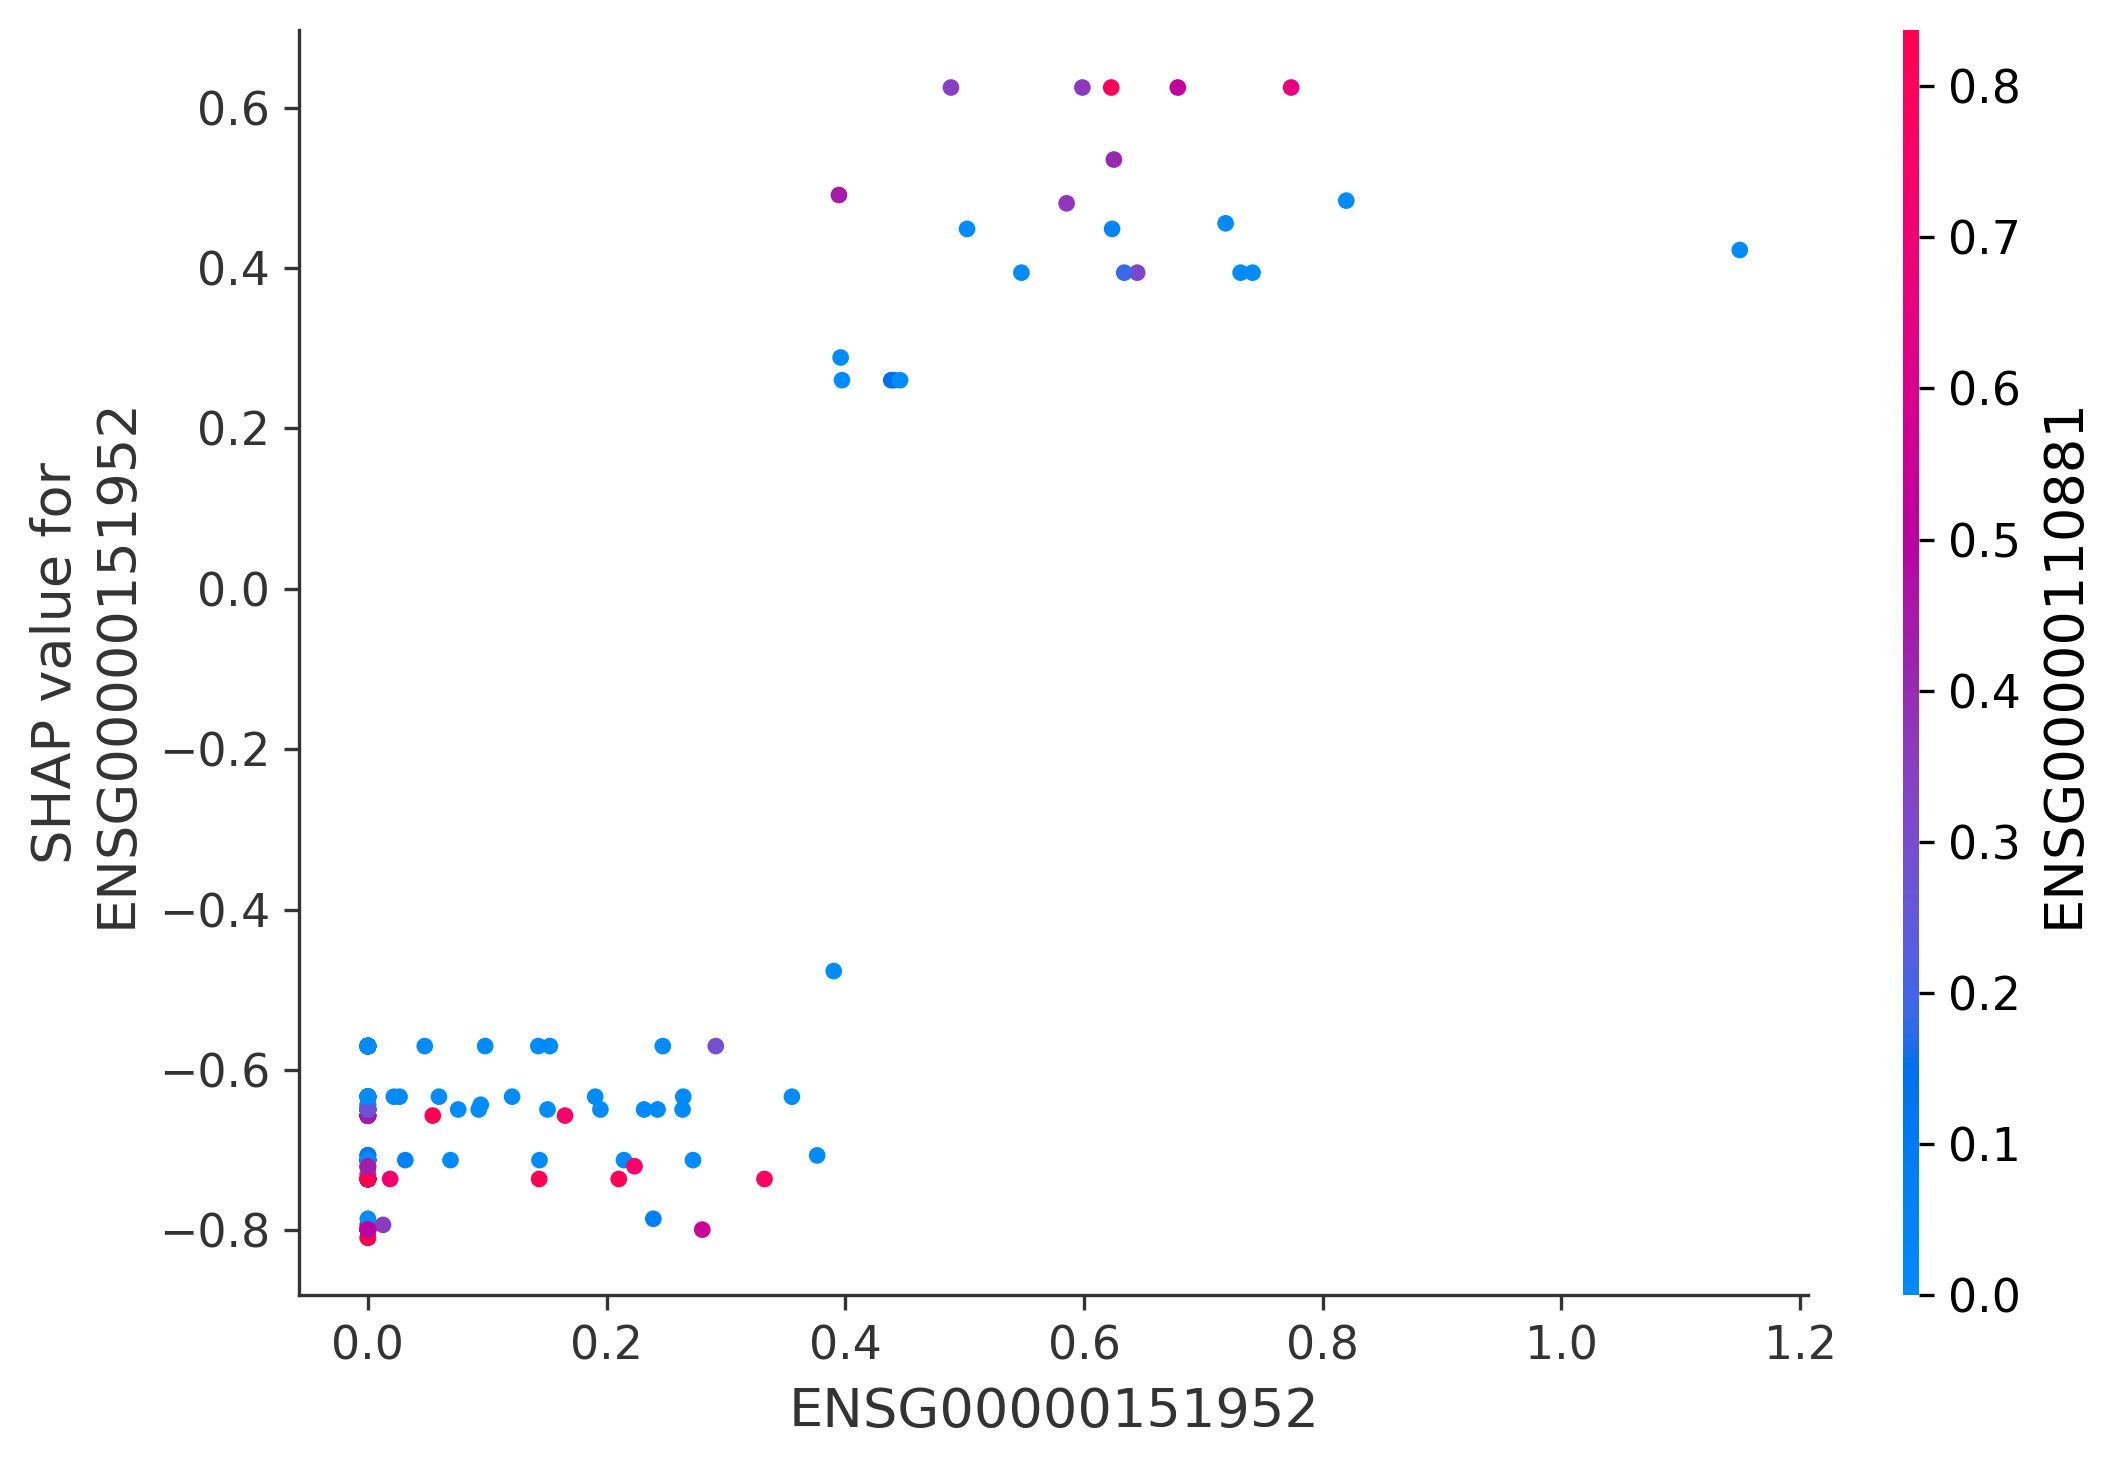


Dependence plot for TMEM132D (second most important feature).

**Supplementary Figure S7: SHAP Dependence Plot - CRIP2**


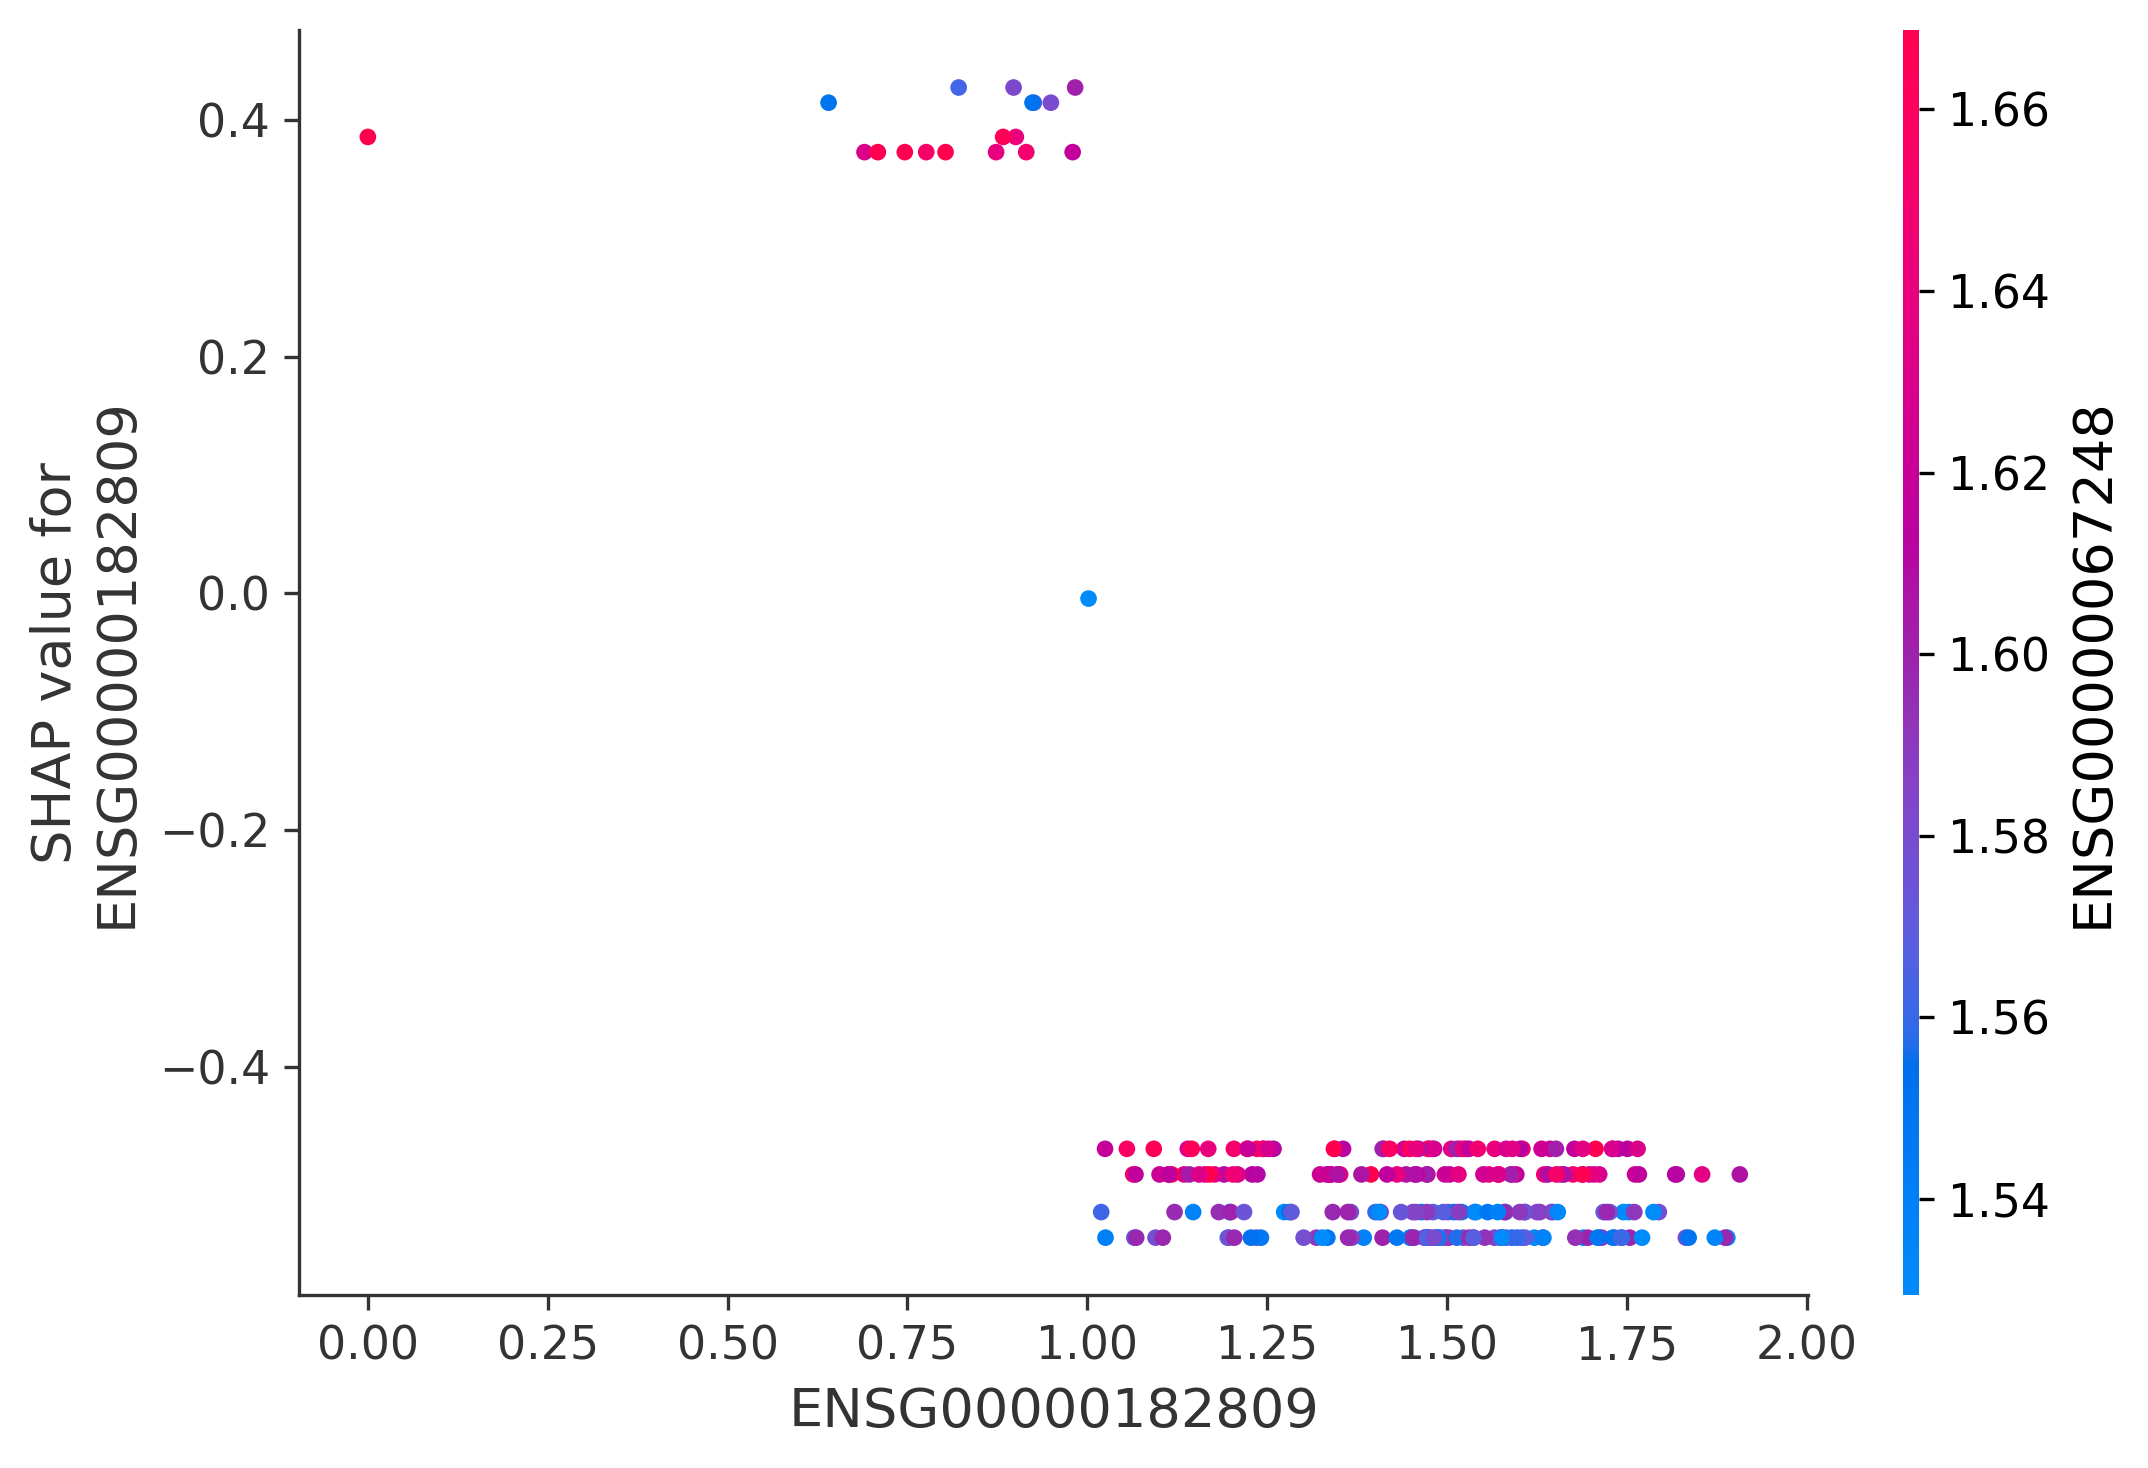


Dependence plot for CRIP2 (third most important feature).

**Supplementary Figure S8: Cell-Type Deconvolution Results**


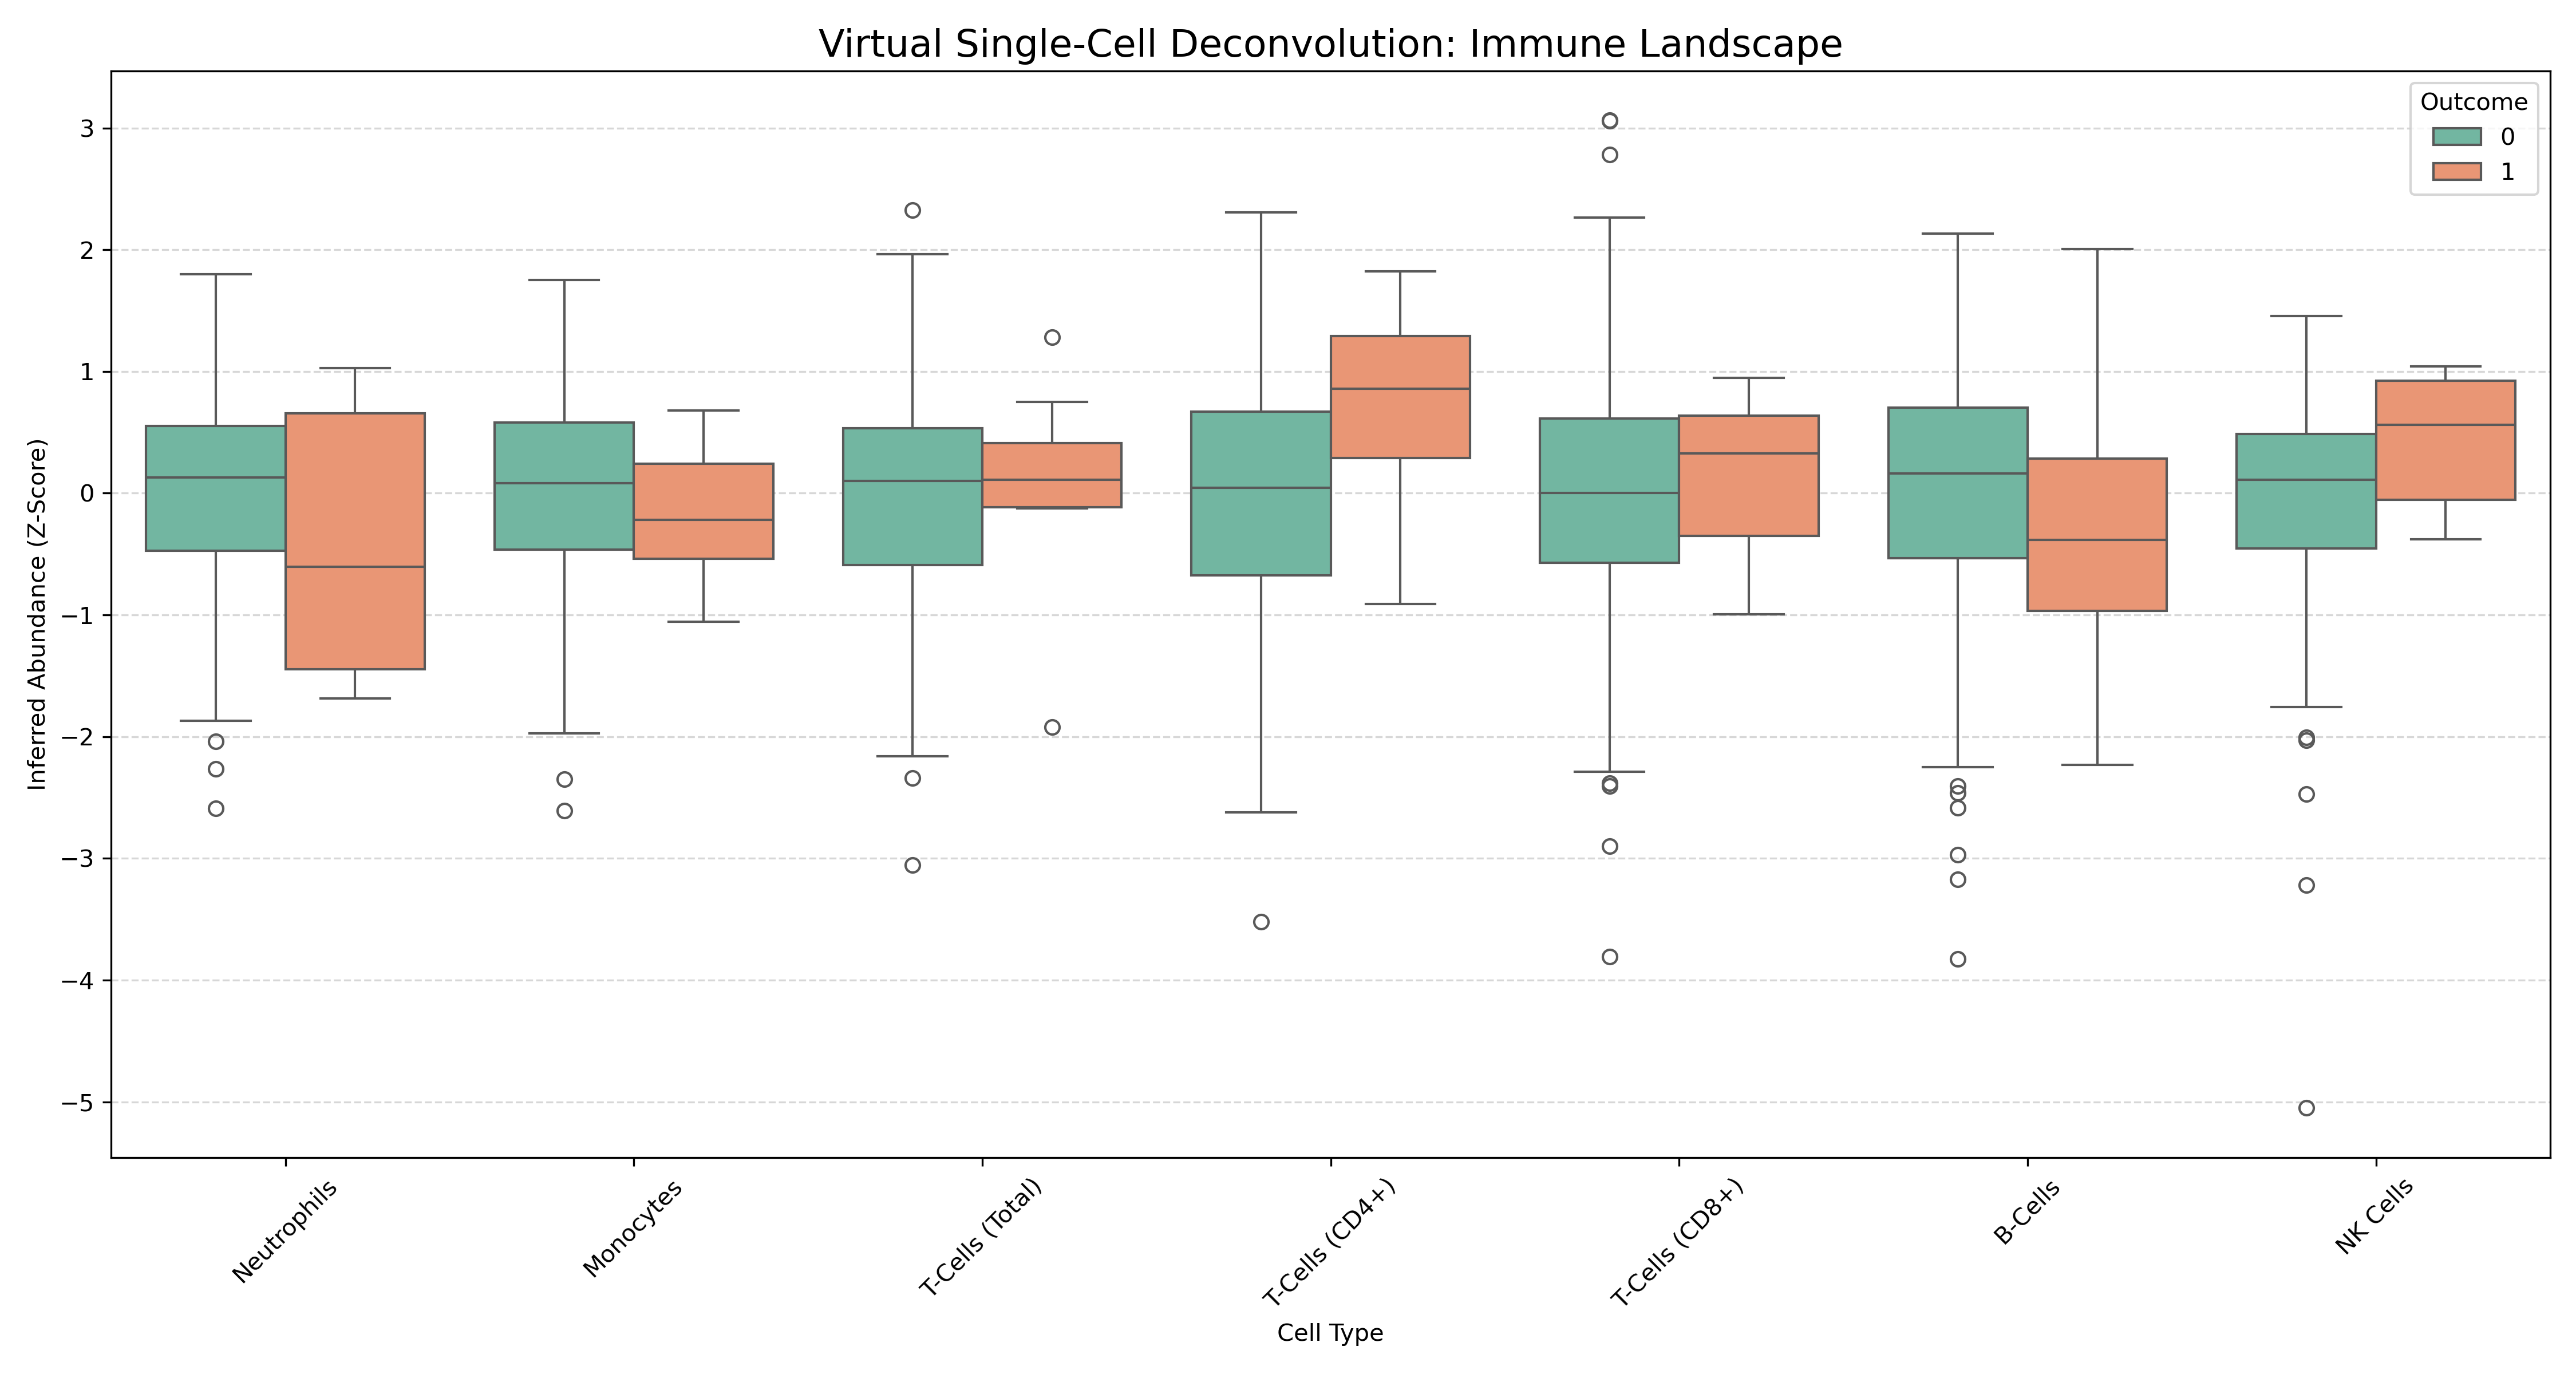


Boxplots showing distribution of LM22-inferred cell-type proportions (Z-normalized) by outcome group.

**Supplementary Figure S9: Single-Cell Validation (PBMC3k)**


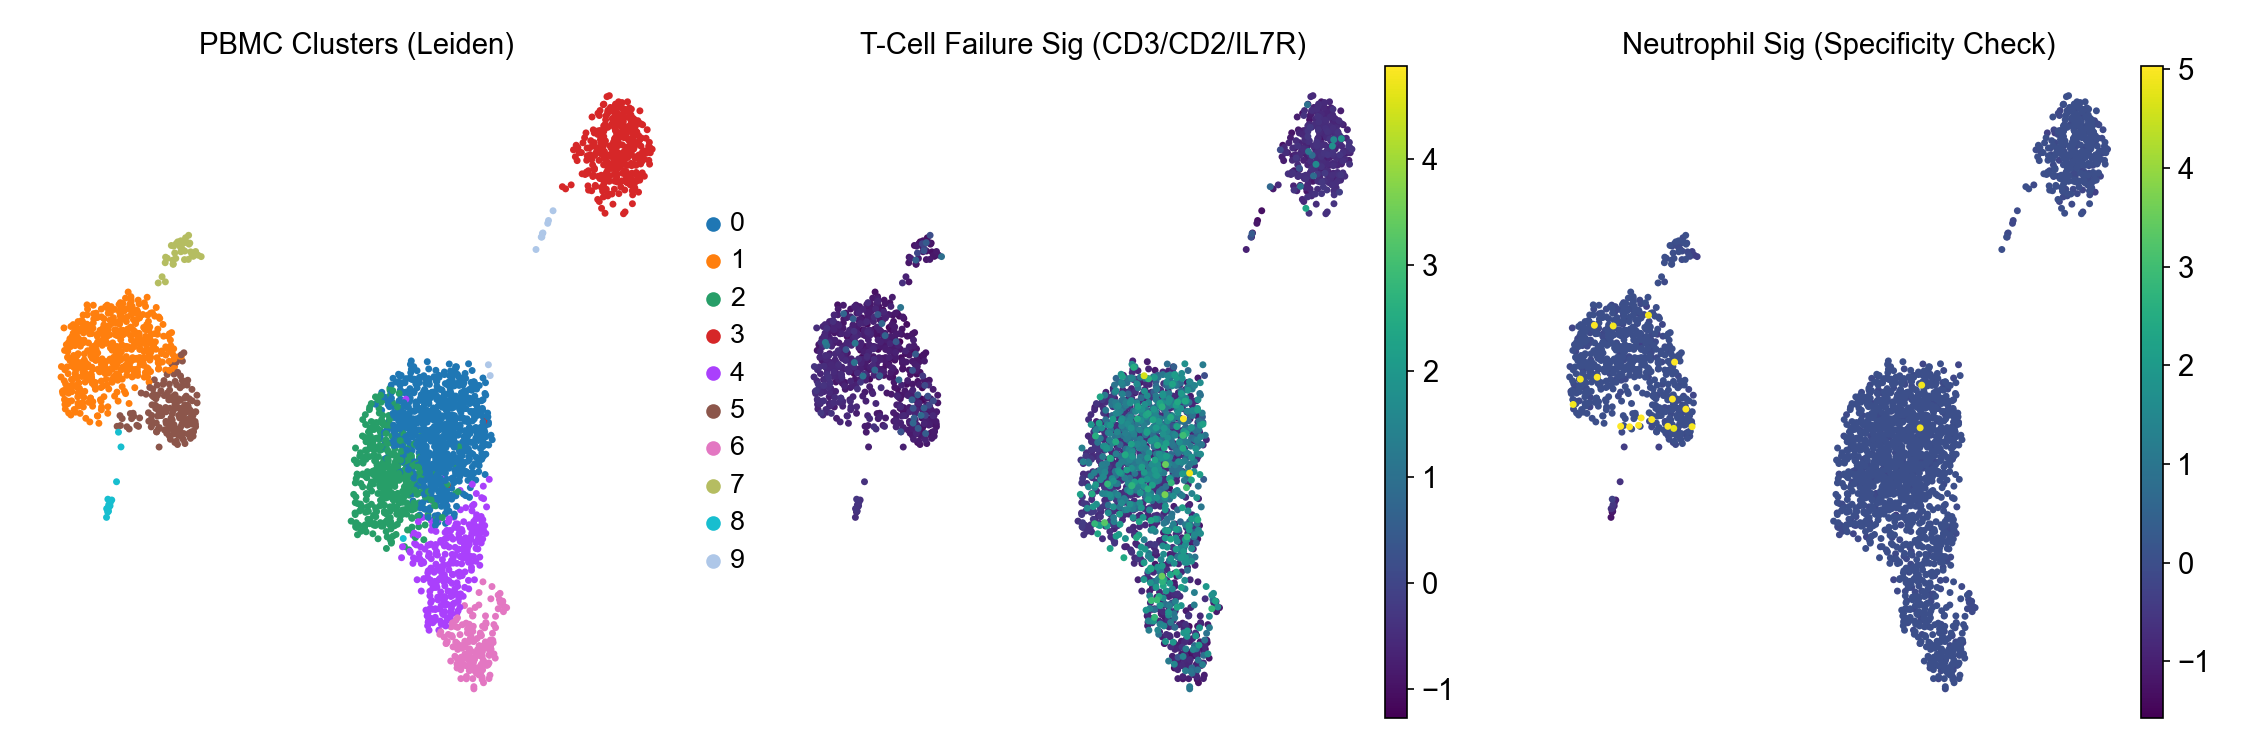


UMAP visualization of PBMC3k dataset with failure signature scores overlaid.

**Supplementary Figure S10: Causal Dependency Graph**


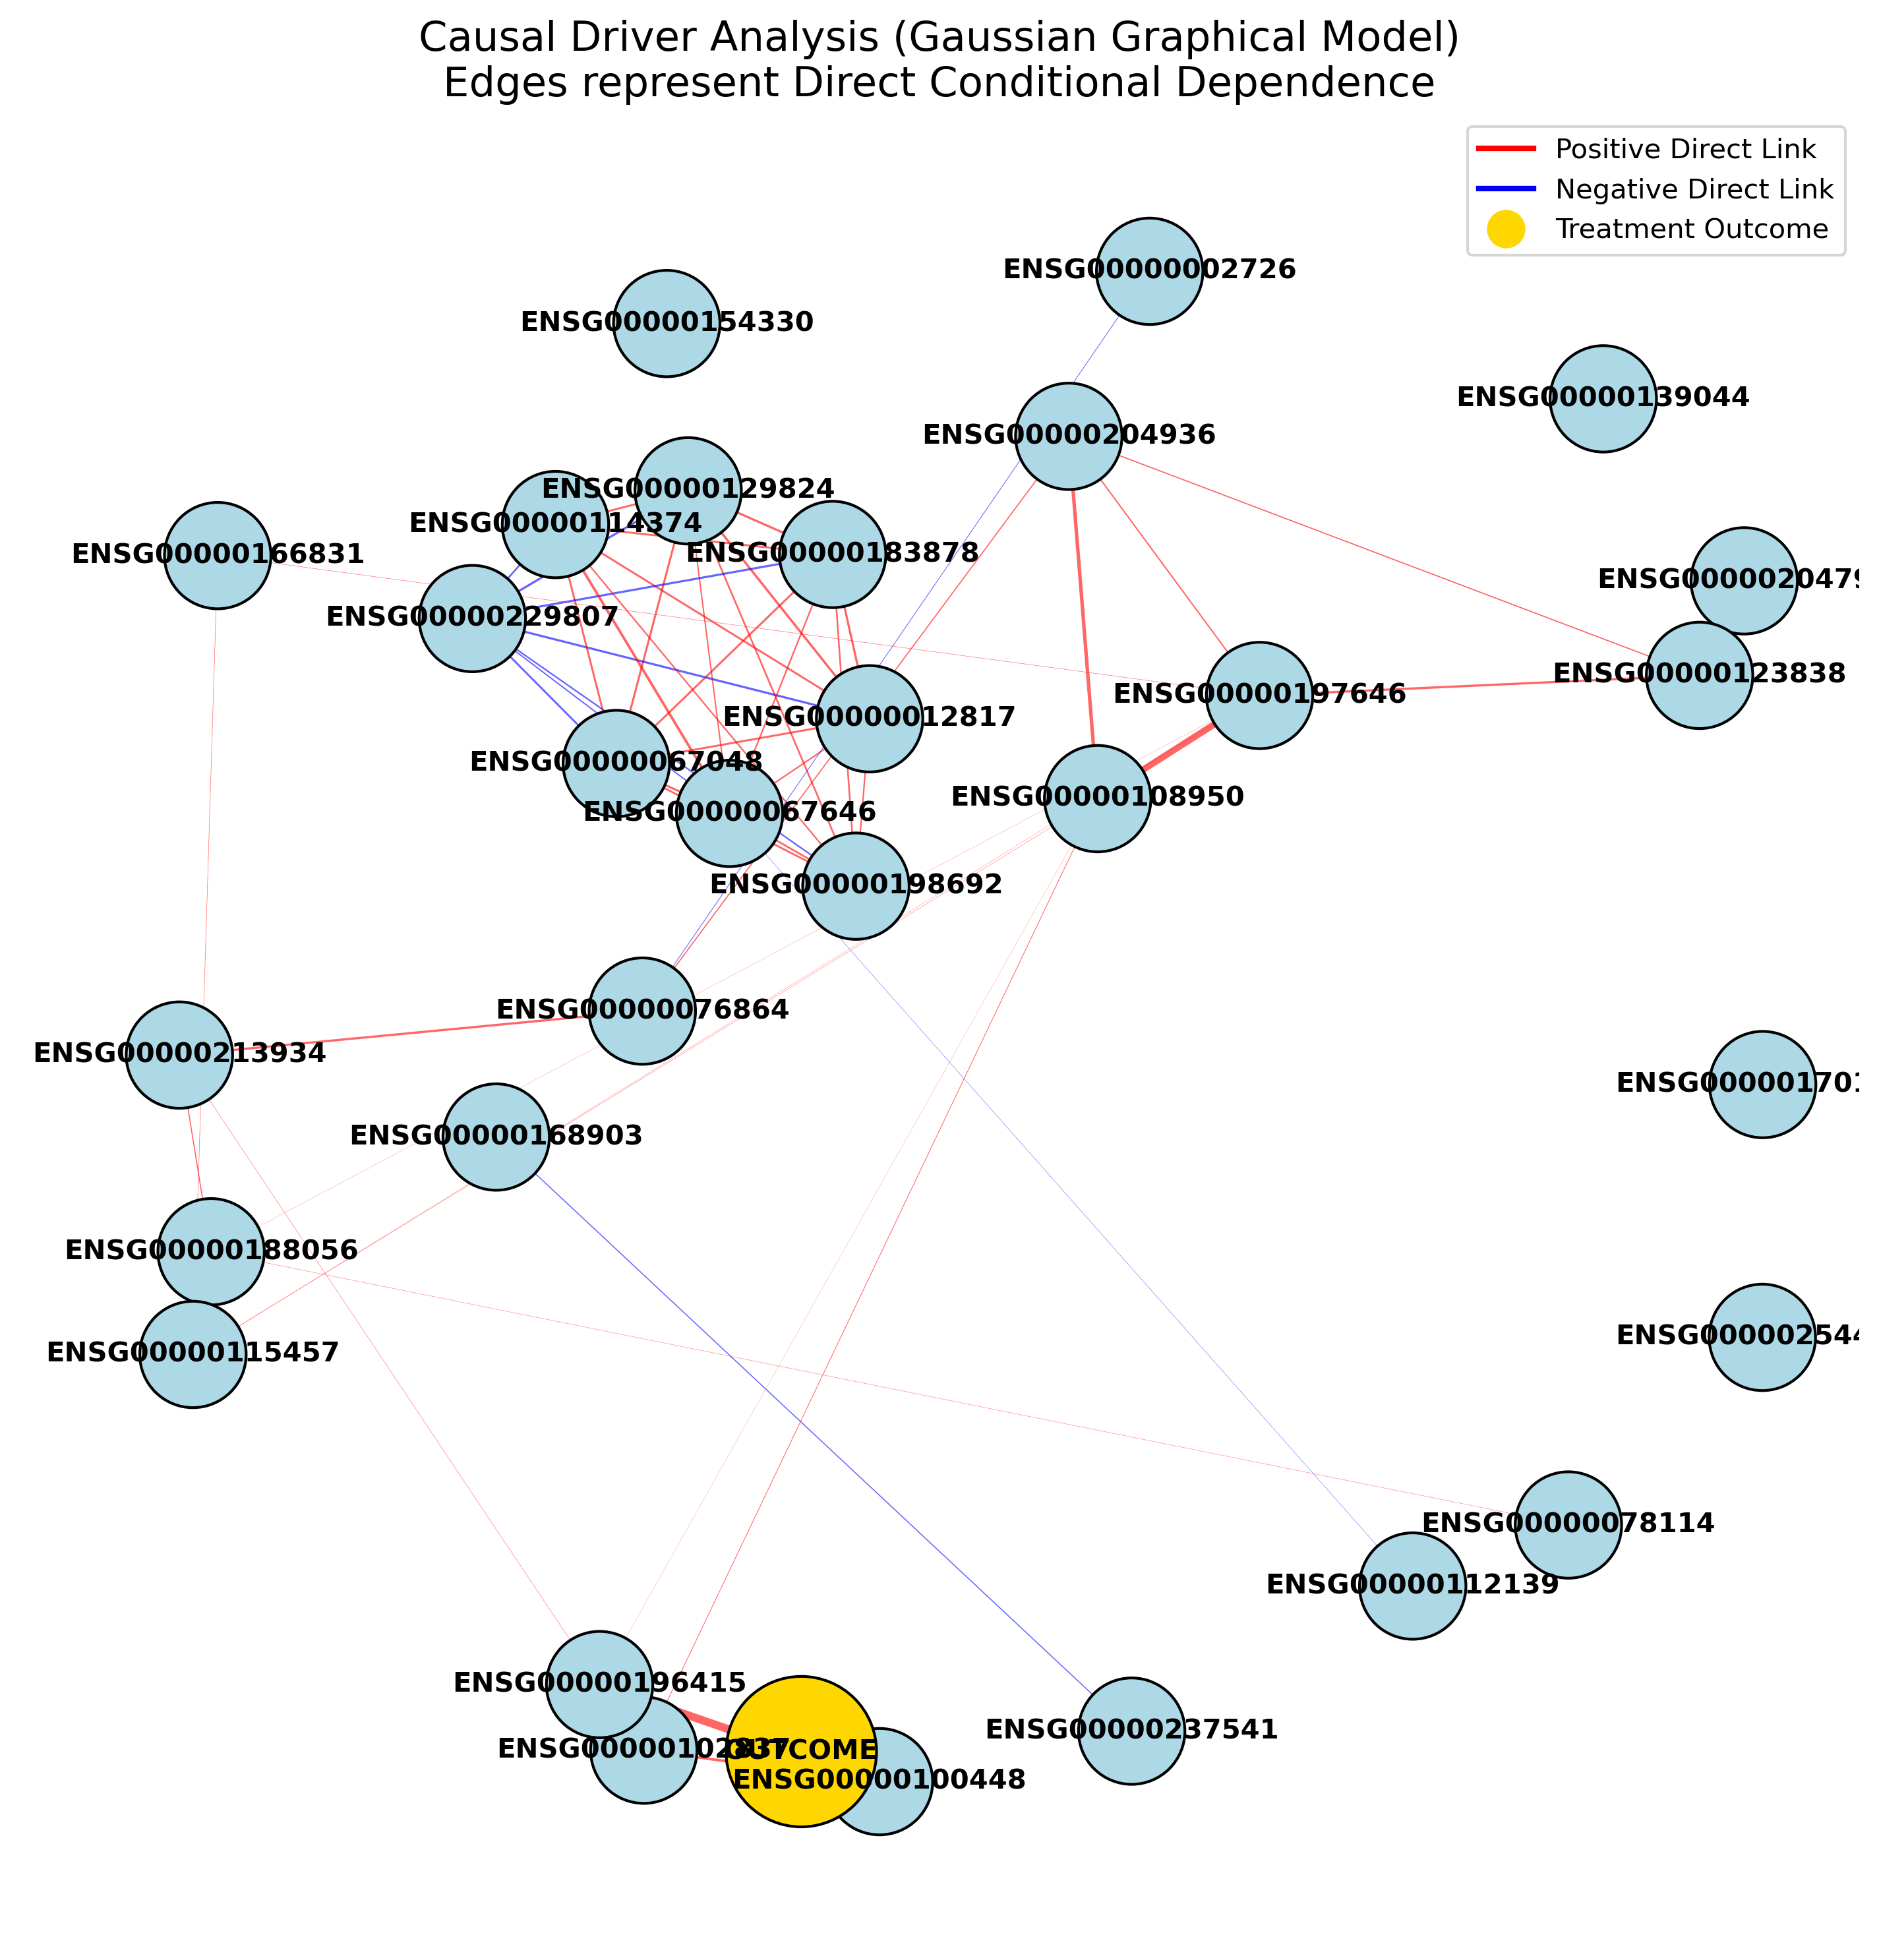


Gaussian Graphical Model showing stability-selected edges between predictive genes.

**Supplementary Figure S11: Gene Expression Heatmap**


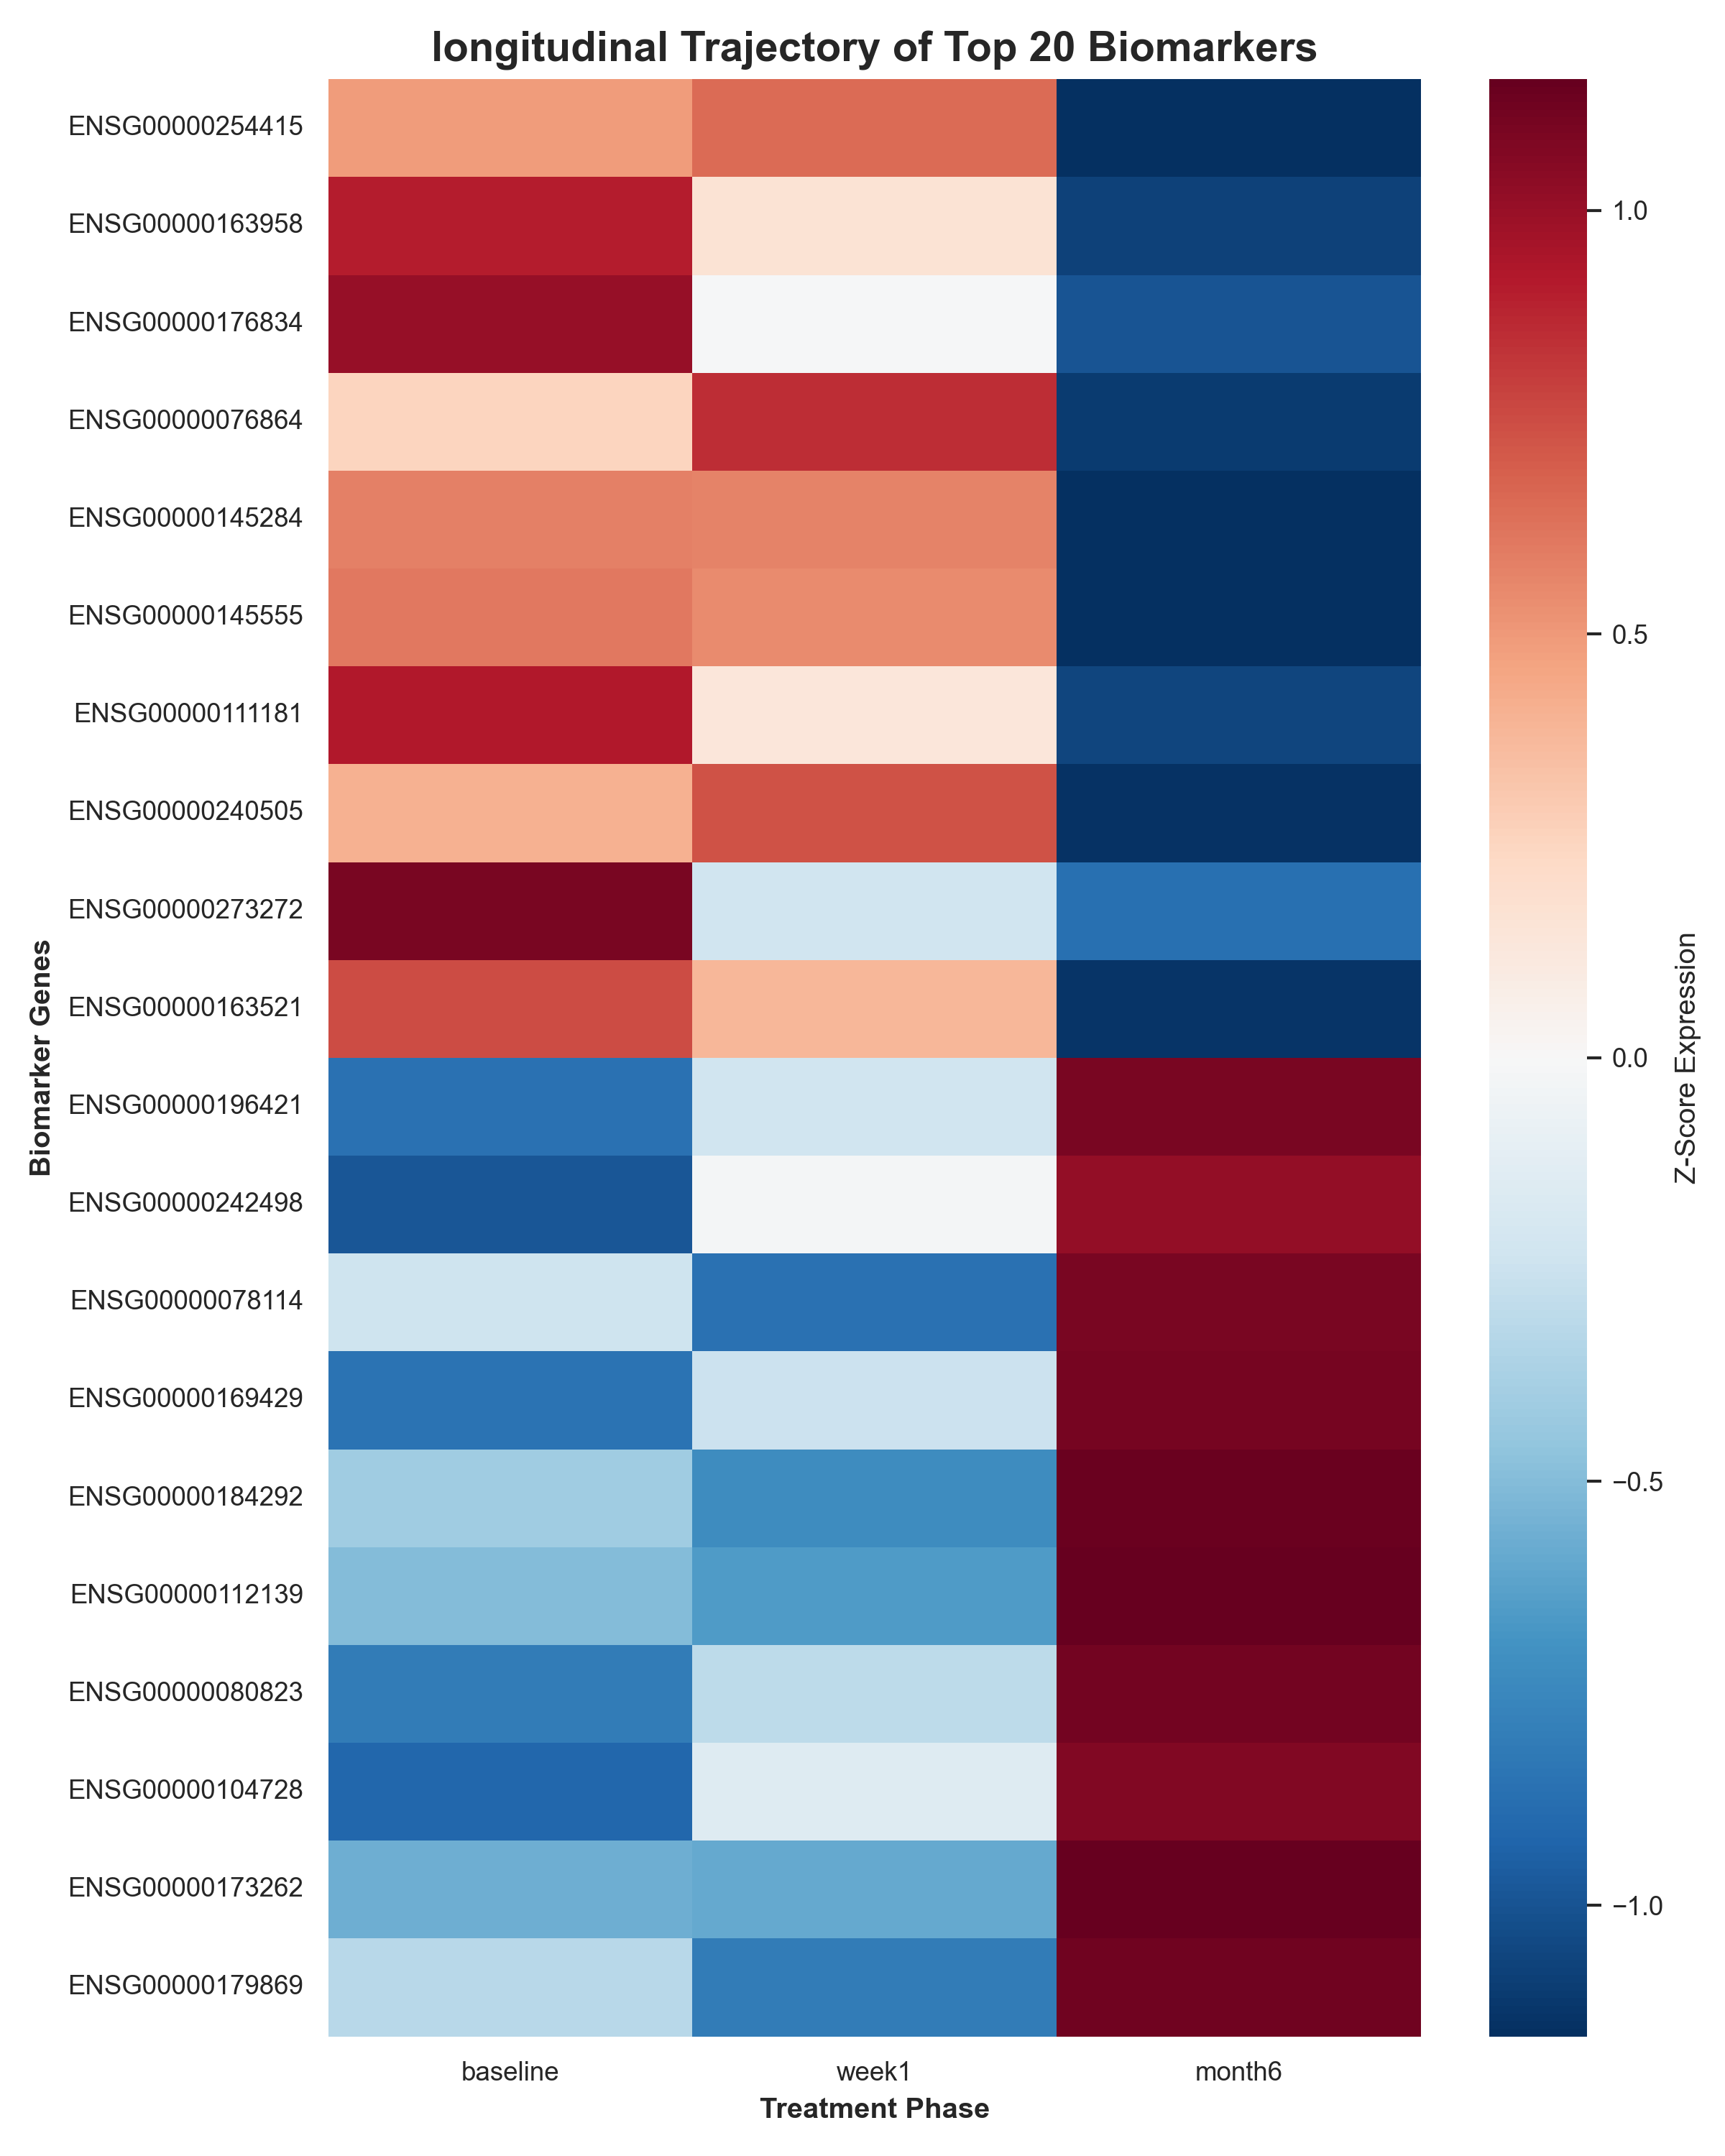


Heatmap of top predictive genes showing expression patterns across samples.

**Supplementary Figure S12: Multi-Omics Integration Network**


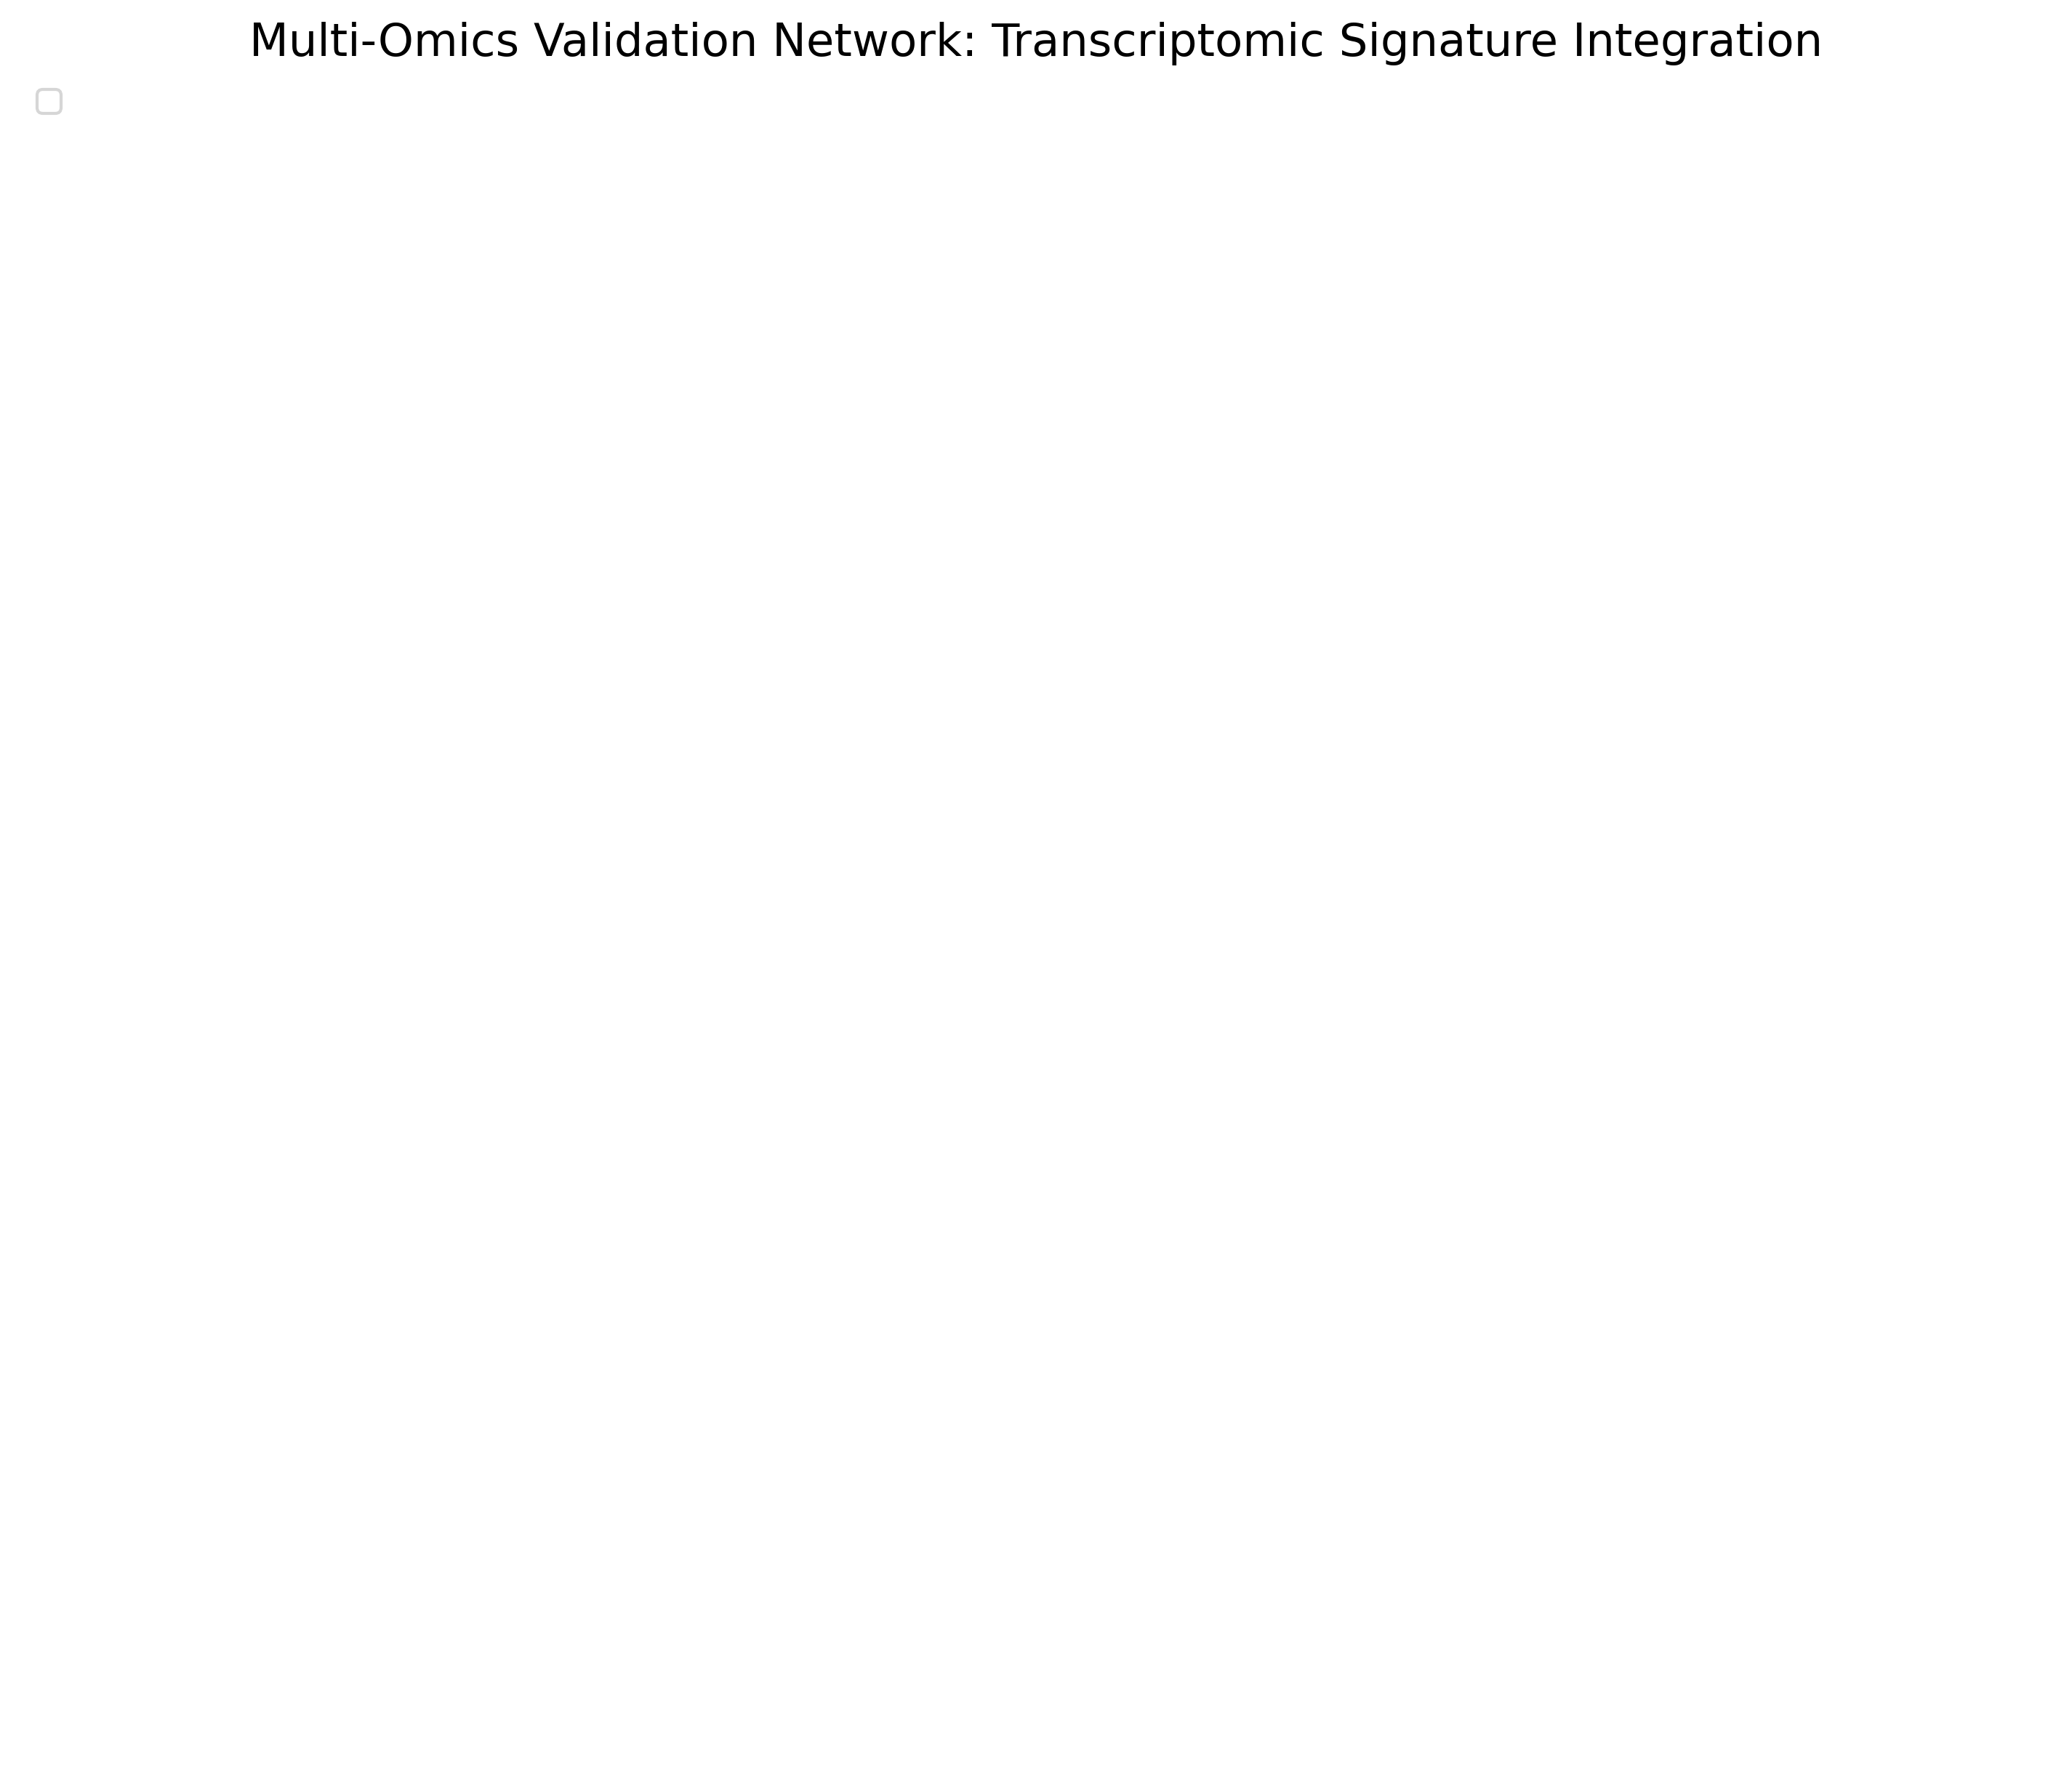


Network visualization showing relationships between transcriptomic and cellular features.

**Supplementary Figure S13: Within-Cohort Treatment Response**


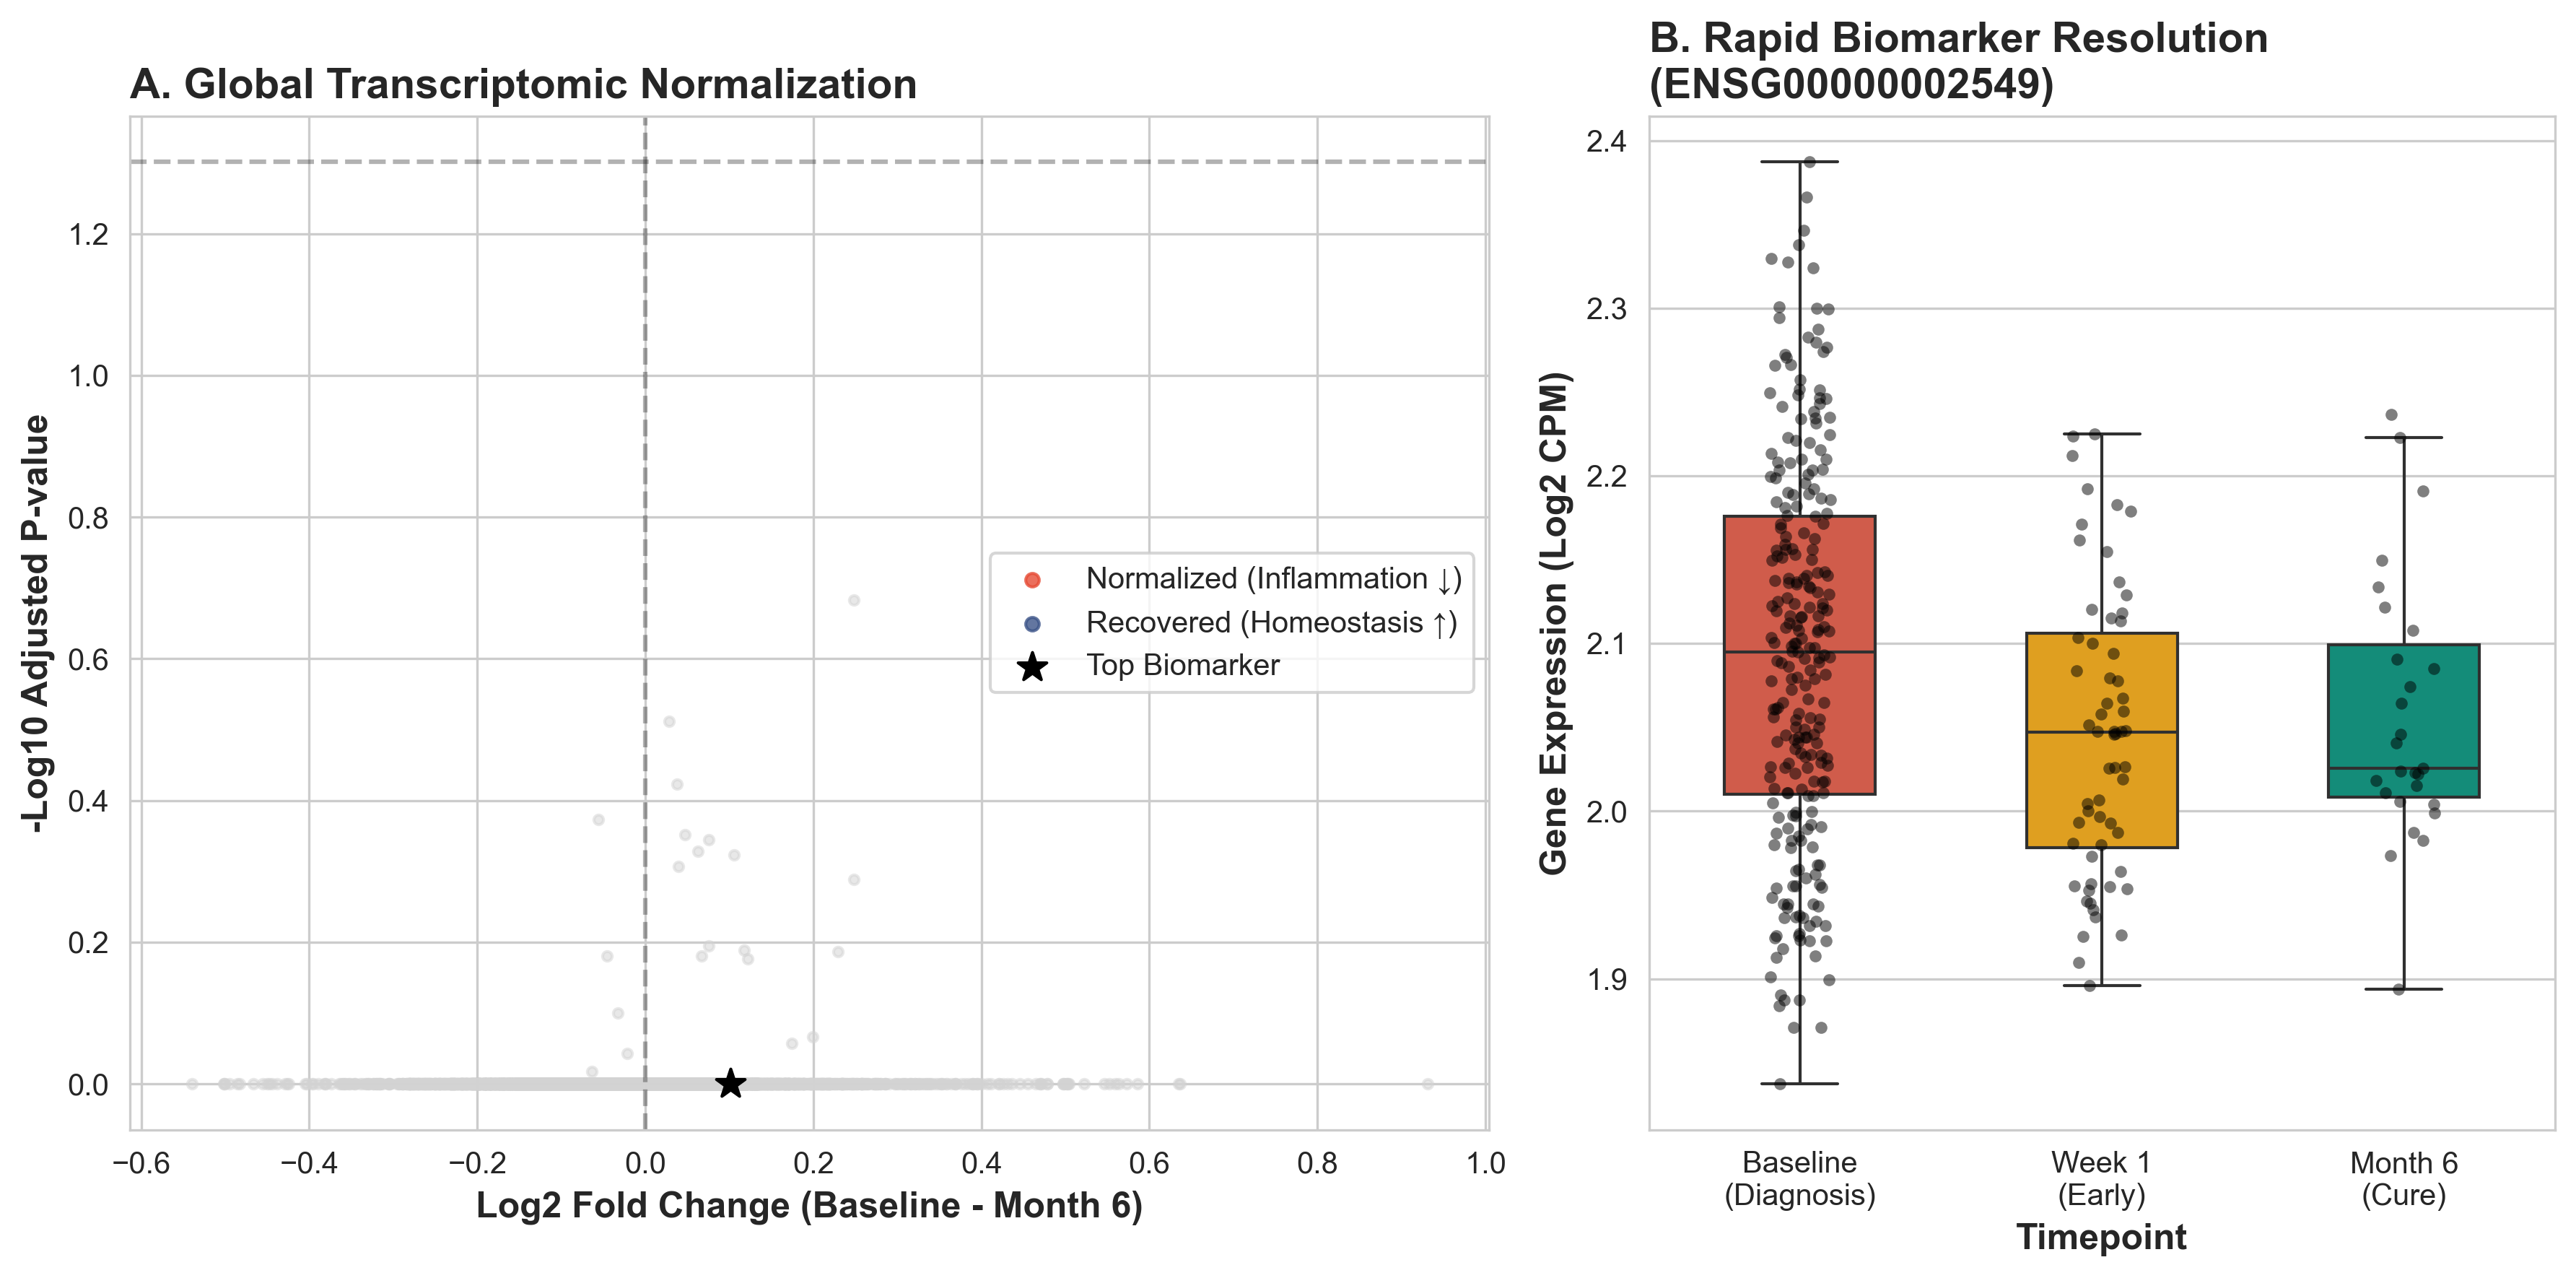


Expression changes during treatment stratified by outcome (high quality version).
